# Supplementary material
Source: ML conference proceedings conference paper supplement (https://openreview.net/forum?id=cnpR4e2HCQ)
Supplement: supplementary_material [file attachment]

## Appendix - Community Detection Guarantees using Embeddings Learned by Node2Vec

The Appendix consists of the proofs of the results stated within the paper, along with some extra discussions which would detract from the flow of the main paper. We also provide some additional simulation results relating to node classification, and further simulated and real data experiments examining community detection.

### A Additional Experimental Results

Here we provide additional details describing the experimental results presented in the main paper. We also describe additional experiments. All experiments were run on a computing cluster utilising 4 cores of an Intel E5-2683 v4 Broadwell 2.1GHz CPU or similar with 2 GB of memory per core. Each individual experimental run required at most 2 hours of computing time. All experiments, including initial preliminary experiments, required approximately 25k CPU hours. All code required to reproduce all results is included in the code repository in the supplemental files.

**Additional Simulation, Node Classification** We provide a simple experiment to support the theoretical results on node classification demonstrated in Section D of the appendix. We simulate data from a  $\text{SBM}(n/\kappa, \kappa, \tilde{p}, \tilde{q}, \rho_n)$  as before with  $\tilde{q} = \tilde{p}\beta$  as in the main text. We learn an embedding of each node using node2vec with embedding dimension of 64 and all other parameters set at their default values. We then use the true community labels of 10% of these nodes to train a (multinomial) logistic regression classifier, and predict the class label for the remaining 90% of nodes in the network. We examine the performance of this classification tool using the node2vec embeddings in terms of classification accuracy. We show these results in Figure S1 for  $\rho_n = \log(n)/n$ , with 10 simulations for each setting, with the mean across these simulations and error bars indicating one standard error. This classifier has excellent accuracy at predicting the labels of other nodes.

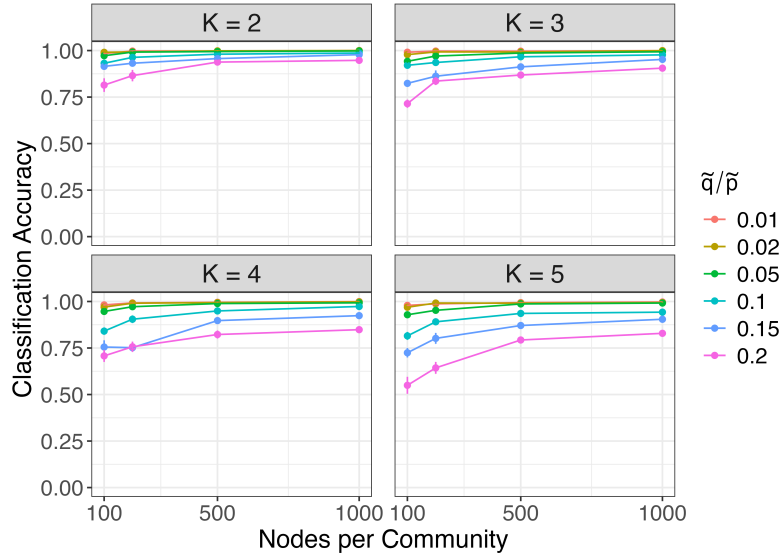

Figure S1: Classification accuracy using 10% of the node embeddings to learn a multinomial logistic regression classifier. Mean and one standard error shown.

**Additional Results, Community Detection** Here we include additional simulation results which were omitted from the main text. In particular, for the simulations considered in the main manuscript we now examine the community recovery performance in terms of the normalized mutual information [9]. We show the average NMI score across these simulations, along with error bars corresponding to one standard error. In each case, the NMI metric is similar to the proportion of nodes correctly recovered. As we increase the number of nodes this performance improves.

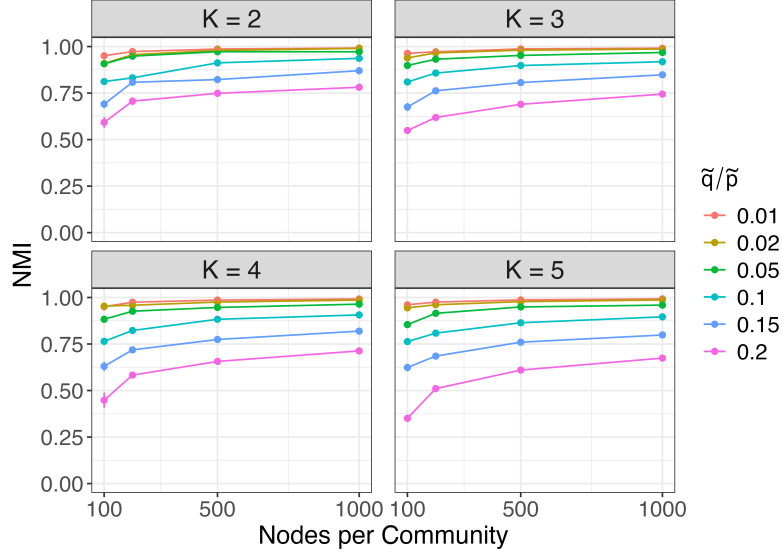

Figure S2: NMI for relatively sparse SBM. Mean and one standard error shown.

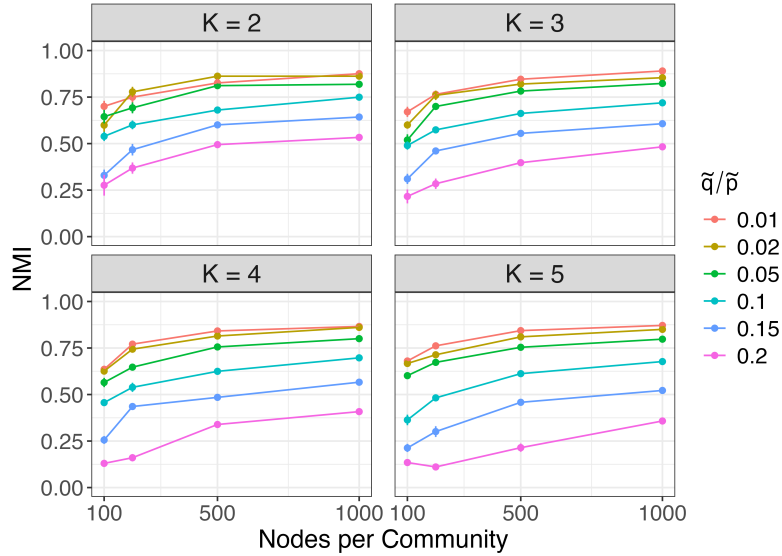

Figure S3: NMI for relatively sparse DC-SBM. Mean and one standard error shown.

517 **Rates of Convergence** We can also investigate the empirical convergence of these methods. Here,  
518 we consider the same simulated SBM data as above, and examine the convergence in the proportion  
519 of nodes correctly recovered, as we increase the number of nodes in the network, for  $\kappa = 2, 3, 4, 5$ .  
520 We empirically investigate this convergence using a log-log plot, which is shown in Figure S5 for  
521 a relatively sparse SBM. Our node2vec procedure demonstrates empirical convergence which is  
522 super-linear for dense networks while being sub-linear for relatively sparse networks.

523 **Varying the node2vec walk parameters** We also wish to examine the performance of our proposed  
524 clustering procedure when the parameters of the random walk are varied. While  $p$  and  $q$  are both  
525 commonly chosen to be 1, resulting in a simple random walk, other values are possible. We consider  
526 data simulated from the relatively sparse DC-SBM considered previously with  $\kappa = 2$  communities and  
527 consider the within between community probability ratio  $\beta = .01$  and  $\beta = 0.2$ , corresponding to an  
528 easier and harder setting to recover the communities respectively. We then consider  $p, q \in \{0.5, 1, 2\}$ ,  
529 the common possible values and vary the number of nodes in each community as before. For each

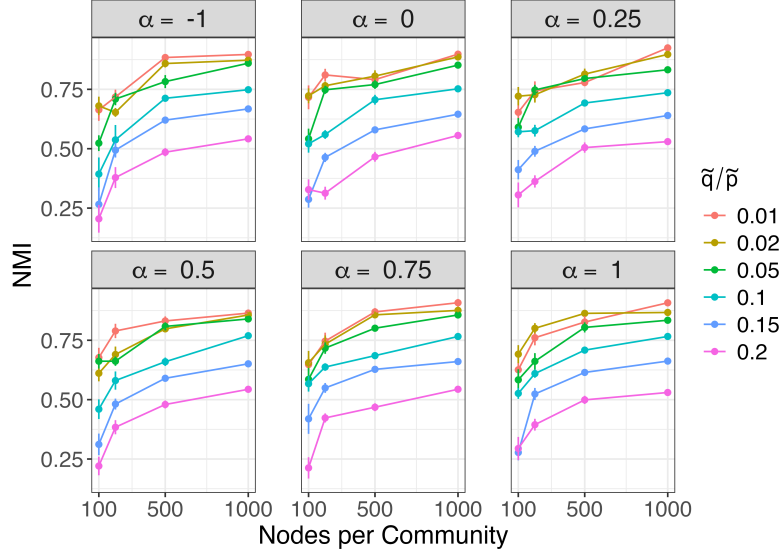

Figure S4: NMI varying  $\alpha$  for relatively sparse DC-SBM. Mean and one standard error shown.

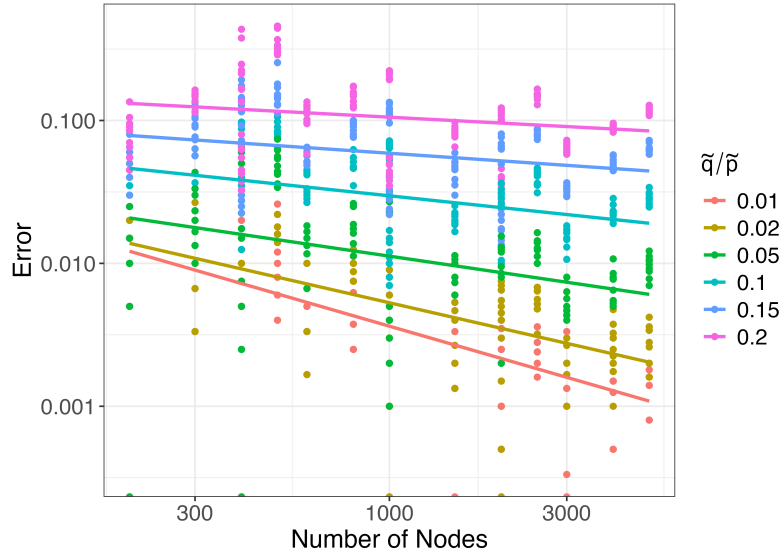

Figure S5: Log-Log plot showing the rate of convergence as we increase the number of nodes in the network. We show a fitted regression for each of the values of  $\beta$ , showing better convergence when the difference between the within and between community edge probabilities is higher.

530 of these settings we perform community detection using node2vec and spectral clustering. When  
 531  $\beta = 0.01$  we obtain excellent community recovery for all values of  $p$  and  $q$ , as shown in Figure S6(a).  
 532 When  $\beta = 0.2$  community recovery is more challenging for small networks for all values of  $p$  and  
 533  $q$ . As the number of nodes increases, Figure S6(b) shows that all choices of  $p$  and  $q$  result in good  
 534 performance.

#### 535 A.1 Performance on Real Networks

536 We wish to further examine the performance of this community detection procedure for real networks,  
 537 with known community structure. We also wish to compare this procedure to spectral clustering,  
 538 which is widely used in practice for community detection. We use two publicly available networks  
 539 containing known community structure. We first consider a network of emails between 1005 members

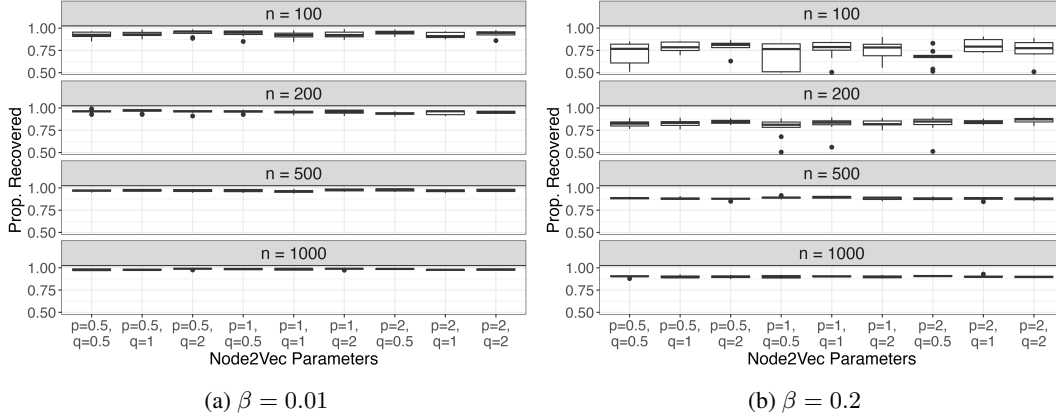

Figure S6: Varying the node2vec sampling parameters for DC-SBMs with  $\beta = 0.01$  (left) and  $\beta = 0.2$  (right). Community recovery is harder when  $\beta$  is larger and this is seen for all values of  $p$  and  $q$  for small networks. As the number of nodes increases we get good community recovery for all choices of  $p$  and  $q$ .

of a large research institution, available as part of the Stanford Network Analysis Project [30]. There are 25571 directed edges between the nodes in this network, with known ground truth communities consisting of 42 departments present in this institution. We also consider a widely used dataset of directed edges between 1490 U.S political blogs, collected before the 2004 elections [2]. Here the directed edges correspond to hyperlinks, with ground truth communities corresponding to whether the blogs has been identified as liberal or conservative.

For each of these datasets we compare the community recovery of Node2Vec and traditional spectral clustering, using the normalized graph Laplacian. As is common in the literature, we remove the direction from these edges and take the largest connected component, forming symmetric adjacency matrices with 986 and 1222 nodes respectively. We then use the previously described procedure to perform community detection using Node2Vec. We consider a range of embedding dimensions ( $d = 16, 32, 64, 128, 256$ ) and unigram sampling parameter ( $\alpha = -1, 0.0, 0.25, 0.5, 0.75, 1.0$ ), while keeping all other parameters fixed at the defaults considered before. With the true number of communities known, we then compare the estimated communities from 10 simulations for each of these parameter settings, along with performing 10 simulations of spectral clustering for each of these settings.

In Figure S7 we compare the performance of Node2Vec and spectral clustering for the Email network and in Figure S8 we use the Political Blogs network. We measure community recovery in terms of the normalized mutual information (NMI) between the estimated and true communities. Other metrics such as the adjusted rand index (ARI) showing similar results. In each case the communities estimated by Node2Vec are substantially closer to the true communities than those estimated by spectral clustering. As highlighted by Karrer and Newman [22] for the political blog data, models which do not account for degree heterogeneity can struggle to recover the underlying community structure. As shown in Figure S8, spectral clustering is unable to recover the communities due to this heterogeneity, while clustering using the Node2Vec embedding shows strong performance at community recovery.

We also further expand on the role of the embedding parameters in the performance of Node2Vec on these real networks. In Figure S9 we examine community recovery for the Email data as we vary the embedding dimension  $d$  and the unigram sampling parameter  $\alpha$ . As we vary each of these parameters we see good community recovery in all settings. For this dataset all choices of embedding dimension and unigram parameter give good NMI scores.

## B Additional Notation

We give a brief recap of some of the notation introduced in the main paper, along with some more notation which is used purely within the Supplementary Material. Throughout, we will suppose that

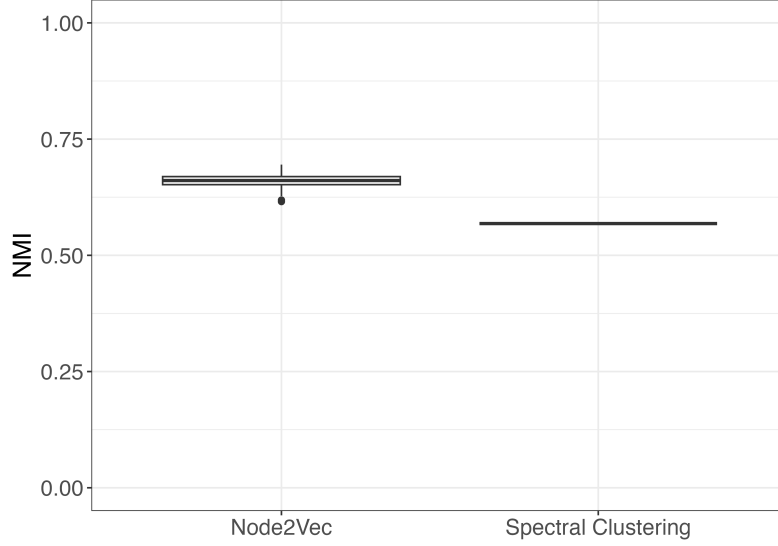

Figure S7: Community recovery for the Email data, using both Node2Vec and Spectral Clustering. Node2Vec can better recover the true communities.

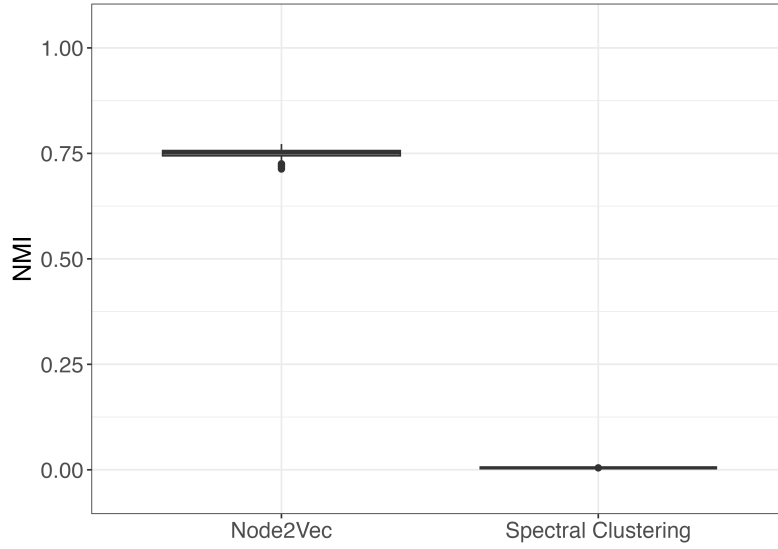

Figure S8: Community recovery for the Political Blog data, using both Node2Vec and Spectral Clustering. Node2Vec can better recover the true communities.

574 the graph  $\mathcal{G} = (\mathcal{V}, \mathcal{E})$  is drawn according to the following generative model: each vertex  $u \in \mathcal{V}$   
575 have latent variables  $\lambda_u = (c(u), \theta_u)$  where  $c(u) \in [\kappa]$  is a community assignment, and  $\theta_u$  is a  
576 degree-heterogeneity correction factor. We then suppose that the edges  $a_{uv} \in \{0, 1\}$  in the graph  $\mathcal{G}_n$   
577 on  $n$  vertices arise independently with probability

$$\mathbb{P}(a_{uv} = 1 \mid \lambda_u, \lambda_v) = \rho_n \theta_u \theta_v P_{c(u), c(v)} \quad (\text{S1})$$

578 for  $u < v$ , with  $a_{uv} = a_{vu}$  by symmetry for  $u > v$ <sup>2</sup>. The factor  $\rho_n$  accounts for sparsity in the  
579 network. The above model corresponds to a degree corrected stochastic block model [22]; we

<sup>2</sup>To prevent notation overloading when  $A$  is used to indicate constants, we use  $a_{uv}$  to describe the presence or absence of an edge between nodes  $u$  and  $v$  in the supplement, rather than  $A_{uv}$  which was used in the main text.

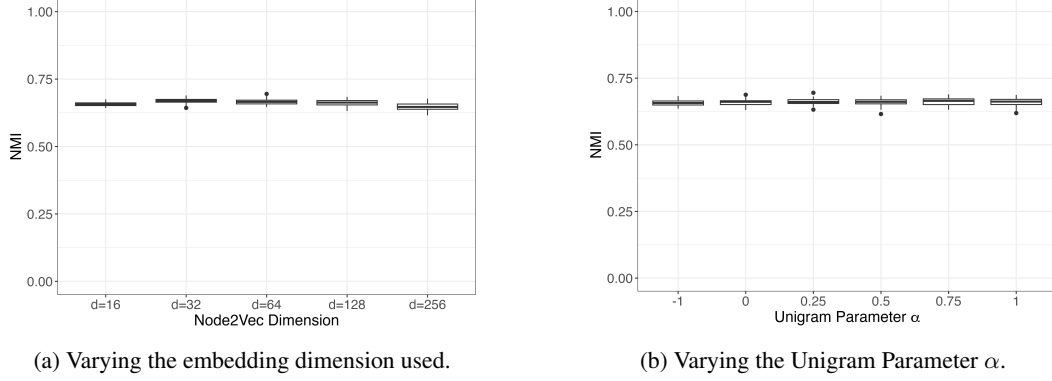

Figure S9: The effect of different Node2Vec parameters on community recovery, measure in terms of Normalized Mutual Information (NMI), for the Email Data.

highlight that the case where  $\theta_u$  is constant across all  $u \in \mathcal{V}$  corresponds to the original stochastic block model [19]. For convenience, we will write

$$W(\lambda_u, \lambda_v) = \theta_u \theta_v P_{c(u), c(v)} \quad \text{so} \quad \mathbb{P}(A_{uv} = 1 \mid \lambda_u, \lambda_v) = \rho_n W(\lambda_u, \lambda_v). \quad (\text{S2})$$

We then introduce the notation

$$W(\lambda_i, \cdot) := \mathbb{E}[W(\lambda_i, \lambda_j) \mid \lambda_i], \quad \mathcal{E}_W(\alpha) := \mathbb{E}[W(\lambda_i, \cdot)^\alpha] \text{ for } \alpha > 0. \quad (\text{S3})$$

Note that under the assumptions that the community assignments are drawn i.i.d from a Categorical( $\pi$ ) random variable, and the degree correction factors are drawn i.i.d from a distribution  $\vartheta$  independently of the community assignments, we have

$$W(\lambda_i, \cdot) = \theta_i \cdot \mathbb{E}[\theta] \cdot \mathbb{E}_{j \sim \text{Cat}(\pi)}[P_{c(i), j} \mid c(i)] = \theta_i \cdot \mathbb{E}[\theta] \cdot \sum_{j=1}^{\kappa} \pi_j P_{c(i), j}, \quad (\text{S4})$$

$$\mathcal{E}_W(\alpha) = \mathbb{E}[\theta^\alpha] \cdot \mathbb{E}[\theta]^\alpha \cdot \sum_{i=1}^{\kappa} \pi_i \left( \sum_{j=1}^{\kappa} \pi_j P_{i, j} \right)^\alpha \quad (\text{S5})$$

For convenience, we will write  $\tilde{P}_{c(i)} = \sum_{j=1}^{\kappa} \pi_j P_{c(i), j}$ .

Recall that node2vec attempts to minimize the objective

$$\mathcal{L}_n(U, V) := \sum_{i \neq j} \left\{ -\mathbb{P}((i, j) \in \mathcal{P}(\mathcal{G}_n) \mid \mathcal{G}_n) \log(\sigma(\langle u_i, v_j \rangle)) \right. \\ \left. - \mathbb{P}((i, j) \in \mathcal{N}(\mathcal{G}_n) \mid \mathcal{G}_n) \log(1 - \sigma(\langle u_i, v_j \rangle)) \right\}$$

where  $U, V \in \mathbb{R}^{n \times d}$ , with  $u_i, v_j \in \mathbb{R}^d$  denoting the  $i$ -th and  $j$ -th rows of  $U$  and  $V$  respectively, and  $\sigma(x) := (1 + e^{-x})^{-1}$  denoting the sigmoid function. Here  $\mathcal{P}$  and  $\mathcal{N}$  correspond to the positive and negative sampling schemes induced by the random walk and unigram mechanisms respectively.

## C Proof of Theorems 2 and 3

### C.1 Proof overview

To give an overview of the proof approach, we work by forming successive approximations to the function  $\mathcal{L}_n(U, V)$  where we have uniform convergence of the approximation error as  $n \rightarrow \infty$  over either level sets of the function considered, or the overall domain of optimization of the embedding matrices  $U$  and  $V$ . We break these approximations up into multiple steps:

1. Theorems S1, S2, S3 and Proposition S4 - We begin by working with an approximation  $\hat{\mathcal{L}}_n(U, V)$  of  $\mathcal{L}_n(U, V)$ , where the sampling weights  $\mathbb{P}((i, j) \in \mathcal{P}(\mathcal{G}_n) \mid \mathcal{G}_n)$  and  $\mathbb{P}((i, j) \in \mathcal{N}(\mathcal{G}_n) \mid \mathcal{G}_n)$  are replaced by functions of the latent variables  $(\lambda_i, \lambda_j)$  of the vertices  $i$  and  $j$ , along with  $a_{ij}$  in the case of  $f_{\mathcal{P}}(\lambda_i, \lambda_j)$ .

- 601 2. The resulting approximation  $\widehat{\mathcal{L}}_n(U, V)$  has a dependence on the adjacency matrix of the  
602 network. We argue that this loss function converges uniformly to its average over the  
603 adjacency matrix when the vertex latent variables remain fixed; this is the contents of  
604 Theorem S5.
- 605 3. So far, the loss function only looks between interactions of  $u_i$  and  $v_j$  for  $i \neq j$ . For  
606 theoretical purposes, it is more convenient to work with a loss function where the term with  
607  $i = j$  is included. This is handled within Lemma S6.
- 608 4. Now that we have an averaged version of the loss function to work with, we are able to  
609 examine the minima of this loss function, and find that there is a unique minima (in the sense  
610 that for any pair of optima matrices  $U^*$  and  $V^*$ , the matrix  $U^*(V^*)^T$  is unique). Moreover,  
611 in certain circumstances we can give closed forms for these minima. This is the contents of  
612 Section C.6.
- 613 5. This is then all combined together in order to give Theorems S13 and S14, which correspond  
614 to Theorems 1 and 2 of the main text.

615 We recap that we consider three scenarios - referred to as Scenario (i), (ii) and (iii) throughout - when  
616 proving the following result:

- 617 (i) We use DeepWalk ( $p = q = 1$  in node2vec), and the graph is drawn according to a SBM  
618 with  $\rho_n \gg \log(n)/n$ ;
- 619 (ii) We use node2vec, and the graph is drawn according to a SBM with  $\rho_n = n^{-\alpha}$  for some  
620  $\alpha < \alpha'$ , where  $\alpha'$  depends on node2vec's hyperparameters;
- 621 (iii) We use DeepWalk and a unigram parameter of  $\alpha = 1$ , and the graph is drawn according to a  
622 DCSBM with  $\rho_n \gg \log(n)/n$  where the degree heterogeneity parameters  $\theta_u \in [C^{-1}, C]$   
623 for some  $C > \infty$ .

624 Generally speaking, the approach is the exact same for all three scenarios. As we have a closed formula  
625 in the case where we examine DeepWalk, we will consistently provide the details for the DeepWalk  
626 case first, and then discuss afterwards how the results and proofs change (if at all) when considering  
627 node2vec in generality. Throughout, we also contextualize the proof by examining what it says for a  
628  $\text{SBM}(n, \kappa, \tilde{p}, \tilde{q}, \rho_n)$  model. This corresponds to a balanced network with  $\pi = (\kappa^{-1}, \dots, \kappa^{-1})$ .

## 629 C.2 Replacing the sampling weights

630 Before giving an approximation to  $\mathcal{L}_n(U, V)$ , we need to first come up with approximate forms  
631 of  $\mathbb{P}((i, j) \in \mathcal{P}(\mathcal{G}_n) | \mathcal{G}_n)$  and  $\mathbb{P}((i, j) \in \mathcal{N}(\mathcal{G}_n) | \mathcal{G}_n)$ . The next three results give examples of  
632 this. In this section we prove three main results. The first two give us guarantees for the sampling  
633 probabilities of vertex pairs  $(u, v)$  for node2vec for any choice of the hyperparameters  $(p, q)$ . In  
634 particular they will allow us to argue that when the underlying graph arises from a SBM, the sampling  
635 probabilities asymptotically depend only on the underlying communities. The last specializes this  
636 to the case of DeepWalk (where  $p = q = 1$ ), which has enough structure to allow us to get some  
637 additional information, such as closed formula for these sampling probabilities, which can be used in  
638 the case where the graph arises through a DCSBM.

639 **Theorem S1.** *There exists  $\alpha$  sufficiently small, depending on the walk length  $k$ , such that if  $\rho_n = n^{-\alpha}$   
640 then there exists a symmetric measurable (with respect to the sigma field generated by  $W$ ) function  
641  $f_{\mathcal{P}}(\lambda, \lambda')$  which is bounded below away from zero, and bounded above by  $C\rho_n^{-1}$  for some constant  
642  $C < \infty$ , such that*

$$\max_{i \neq j} \left| \frac{n^2 \mathbb{P}((i, j) \in \mathcal{P}(\mathcal{G}_n) | \mathcal{G}_n)}{a_{ij} f_{\mathcal{P}}(\lambda_i, \lambda_j)} - 1 \right| = o_p(1). \quad (\text{S6})$$

643 **Theorem S2.** *There exists  $\alpha$  sufficiently small, depending on the walk length  $k$ , such that if  $\rho_n = n^{-\alpha}$   
644 then there exists a symmetric measurable (with respect to the sigma field generated by  $W$ ) function  
645  $f_{\mathcal{N}}(\lambda, \lambda')$  which is bounded below away from zero, and bounded above by some constant  $C < \infty$ ,  
646 such that*

$$\max_{i \neq j} \left| \frac{n^2 \mathbb{P}((i, j) \in \mathcal{N}(\mathcal{G}_n) | \mathcal{G}_n)}{f_{\mathcal{N}}(\lambda_i, \lambda_j)} - 1 \right| = o_p(1). \quad (\text{S7})$$

647 The proof of these two results are given in Appendix E.1.1 and E.1.2 respectively. We note that  
 648 while in principle we could give a closed formula for  $f_{\mathcal{P}}$  and  $f_{\mathcal{N}}$  in this scenario, they are sufficiently  
 649 intractable to inspection that doing so would not provide any benefit.

650 In the case of DeepWalk where  $p = q = 1$ , the calculations involved are tractable enough such that  
 651 we can improve the sparsity constraints, give closed forms for the measurable functions discussed  
 652 above, and also provide rates of convergence.

653 **Theorem S3.** *Denote*

$$f_{\mathcal{P}}(\lambda_i, \lambda_j) := \frac{2k}{\rho_n \mathcal{E}_W(1)}, \quad (\text{S8})$$

$$f_{\mathcal{N}}(\lambda_i, \lambda_j) := \frac{l(k+1)}{\mathcal{E}_W(1) \mathcal{E}_W(\alpha)} (W(\lambda_i, \cdot) W(\lambda_j, \cdot)^\alpha + W(\lambda_i, \cdot)^\alpha W(\lambda_j, \cdot)). \quad (\text{S9})$$

654 *Then we have that*

$$\max_{i \neq j} \left| \frac{n^2 \mathbb{P}((i, j) \in \mathcal{P}(\mathcal{G}_n) | \mathcal{G}_n)}{a_{ij} f_{\mathcal{P}}(\lambda_i, \lambda_j)} - 1 \right| = O_p\left(\left(\frac{\log n}{n \rho_n}\right)^{1/2}\right), \quad (\text{S10})$$

$$\max_{i \neq j} \left| \frac{n^2 \mathbb{P}((i, j) \in \mathcal{N}(\mathcal{G}_n) | \mathcal{G}_n)}{f_{\mathcal{N}}(\lambda_i, \lambda_j)} - 1 \right| = O_p\left(\left(\frac{\log n}{n \rho_n}\right)^{1/2}\right). \quad (\text{S11})$$

655 *Proof.* This is a consequence of [11, Proposition 26]. We highlight the referenced result supposes  
 656 that for the negative sampling scheme, vertices for which  $a_{ij} = 0$  are rejected, whereas this does  
 657 not happen here. Other than for the factor of  $(1 - a_{ij})$  in the quoted result, the proof is otherwise  
 658 unchanged, which gives the statement above for  $\mathbb{P}((i, j) \in \mathcal{N}(\mathcal{G}_n) | \mathcal{G}_n)$ .  $\square$

659 With this, we then get the following result:

660 **Proposition S4.** *Denote*

$$\hat{\mathcal{L}}_n(U, V) := \frac{1}{n^2} \sum_{i \neq j} \left\{ -f_{\mathcal{P}}(\lambda_i, \lambda_j) a_{ij} \log(\sigma(\langle u_i, v_j \rangle)) - f_{\mathcal{N}}(\lambda_i, \lambda_j) \log(1 - \sigma(\langle u_i, v_j \rangle)) \right\} \quad (\text{S12})$$

661 *and define the set*

$$\Psi_A := \left\{ U, V \in \mathbb{R}^{n \times d} \mid \mathcal{L}_n(U, V) \leq A \mathcal{L}_n(0_{n \times d}, 0_{n \times d}) \right\} \subseteq \mathbb{R}^{n \times d} \times \mathbb{R}^{n \times d} \quad (\text{S13})$$

662 *for any constant  $A > 1$ , where  $0_{n \times d}$  denotes the zero matrix in  $\mathbb{R}^{n \times d}$ . Then for any set  $X \subseteq$*   
 663  *$\mathbb{R}^{n \times d} \times \mathbb{R}^{n \times d}$  containing the pair of zero matrices  $0_{n \times d}$ , we have under Scenario i) and iii) that*

$$\sup_{(U, V) \in \Psi_A \cap X} |\mathcal{L}_n(U, V) - \hat{\mathcal{L}}_n(U, V)| = O_p\left(A \cdot \left(\frac{\log n}{n \rho_n}\right)^{1/2}\right), \quad (\text{S14})$$

$$\mathbb{P}\left(\arg \min_{(U, V) \in X} \mathcal{L}_n(U, V) \cup \arg \min_{(U, V) \in X} \hat{\mathcal{L}}_n(U, V) \subseteq \Psi_A \cap X\right) = 1 - o(1). \quad (\text{S15})$$

664 *In Scenario (ii), the  $O_p(\cdot)$  bound is replaced by an  $o_p(1)$  bound.*

665 *Proof.* The proof is essentially equivalent to Lemma 32 of Davison and Austern [11] up to changes  
 666 in notation, and so we do not repeat the details.  $\square$

667 Note that in practice we can choose  $A$  to be any constant greater than 1 but fixed with  $n$  - e.g  $A = 10$ ,  
 668 and have the result hold. We will do so going forward.

### 669 C.3 Averaging over the adjacency matrix of the graph

670 Following the proof outline, the next step is to argue that  $\mathcal{L}_n(U, V)$  is close to its expectation when  
 671 we average over the adjacency matrix of the graph  $\mathcal{G}_n$ . We begin with showing what occurs in the



672 DeepWalk case (Scenarios (i) and (iii)), and at the end of the section we discuss how the proof  
 673 changes for the more general node2vec case. Note that we have

$$\mathbb{E}[\widehat{\mathcal{L}}_n(U, V) | \lambda] = \frac{1}{n^2} \sum_{i \neq j} \left\{ -f_{\mathcal{P}}(\lambda_i, \lambda_j) \rho_n W(\lambda_u, \lambda_v) \log(\sigma(\langle u_i, v_j \rangle)) - f_{\mathcal{N}}(\lambda_i, \lambda_j) \log(1 - \sigma(\langle u_i, v_j \rangle)) \right\} \quad (\text{S16})$$

674 and so

$$E_n(U, V) := \frac{\mathcal{E}_W(1)}{2k} \left( \widehat{\mathcal{L}}_n(U, V) - \mathbb{E}[\widehat{\mathcal{L}}_n(U, V) | \lambda] \right) \quad (\text{S17})$$

$$= \frac{1}{n^2} \sum_{i \neq j} \left( \rho_n^{-1} a_{ij} - W(\lambda_i, \lambda_j) \right) \cdot (-\log \sigma(\langle u_i, v_j \rangle)). \quad (\text{S18})$$

675 Note that  $\mathbb{E}[E_n(U, V) | \lambda] = 0$ , and so it therefore suffices to control  $E_n(U, V) - \mathbb{E}[E_n(U, V) | \lambda]$   
 676 uniformly over embedding matrices  $U, V \in \mathbb{R}^{n \times d}$ . This is the contents of the next theorem.

677 **Theorem S5.** *Begin by defining the set*

$$B_{2,\infty}(A_{2,\infty}) := \{U \in \mathbb{R}^{n \times d} : \|U\|_{2,\infty} \leq A_{2,\infty}\}. \quad (\text{S19})$$

678 *Then we have the bound*

$$\sup_{U, V \in B_{2,\infty}(A_{2,\infty})} |E_n(U, V)| = O_p \left( A_{2,\infty}^2 \left( \frac{d}{n \rho_n} \right)^{1/2} \right). \quad (\text{S20})$$

679 *In particular, we also have that*

$$\sup_{U, V \in B_{2,\infty}(A_{2,\infty})} |\widehat{\mathcal{L}}_n(U, V) - \mathbb{E}[\widehat{\mathcal{L}}_n(U, V) | \lambda]| = O_p \left( \frac{A_{2,\infty}^2 k}{\mathcal{E}_W(1)} \left( \frac{d}{n \rho_n} \right)^{1/2} \right). \quad (\text{S21})$$

680 *Proof.* Begin by noting that for any set  $C \subseteq \mathbb{R}^{n \times d} \times \mathbb{R}^{n \times d}$  for which  $0_{n \times d} \times 0_{n \times d} \in C$ , we have  
 681 that

$$\sup_{(U, V) \in C} |E_n(U, V)| \leq \sup_{(U, V) \in C} |E_n(U, V) - E_n(0_{n \times d}, 0_{n \times d})| + |E_n(0_{n \times d}, 0_{n \times d})| \quad (\text{S22})$$

$$\leq \sup_{(U, V), (\tilde{U}, \tilde{V}) \in C} |E_n(U, V) - E_n(\tilde{U}, \tilde{V})| + |E_n(0_{n \times d}, 0_{n \times d})|. \quad (\text{S23})$$

682 We therefore need to control these two terms. We begin with the second; note that as

$$E_n(0_{n \times d}, 0_{n \times d}) = \frac{1}{n^2} \sum_{i \neq j} \left( \rho_n^{-1} a_{ij} - W(\lambda_i, \lambda_j) \right) \cdot \frac{1}{n^2} \quad (\text{S24})$$

683 it follows by Lemma S30 that this term is  $O_p((n^2 \rho_n)^{-1/2})$ . For the first term, we make use of  
 684 a chaining bound. Note that if we write  $T_{ij} = -\log \sigma(\langle u_i, v_j \rangle)$  and  $S_{ij} = -\log \sigma(\langle \tilde{u}_i, \tilde{v}_j \rangle)$  for  
 685  $i, j \in [n]$ , then we have that

$$E_n(U, V) - E_n(\tilde{U}, \tilde{V}) = \frac{1}{n^2} \sum_{i \neq j} \left( \rho_n^{-1} a_{ij} - W(\lambda_i, \lambda_j) \right) \cdot (T_{ij} - S_{ij}). \quad (\text{S25})$$

686 Because the function  $x \mapsto -\log \sigma(x)$  is 1-Lipschitz, it follows that

$$\|T - S\|_F^2 \leq \|UV^T - \tilde{U}\tilde{V}^T\|_F^2, \quad \|T - S\|_\infty \leq \|UV^T - \tilde{U}\tilde{V}^T\|_\infty \quad (\text{S26})$$

687 and consequently we have that

$$\mathbb{P}(|E_n(U, V) - E_n(\tilde{U}, \tilde{V})| \geq u) \quad (\text{S27})$$

$$\leq 2 \exp \left( - \min \left\{ \frac{u^2}{128 \rho_n^{-1} n^{-4} \|UV^T - \tilde{U}\tilde{V}^T\|_F^2}, \frac{u}{16 \rho_n^{-1} n^{-2} \|UV^T - \tilde{U}\tilde{V}^T\|_\infty} \right\} \right) \quad (\text{S28})$$

as a result of Lemma S30. Now, as  $U, V \in B_F(A_F) \cap B_{2,\infty}(A_{2,\infty})$ , by Lemma S19 if we define the metrics

$$d_F((U_1, V_1), (U_2, V_2)) := \|U_1 - U_2\|_F + \|V_1 - V_2\|_F, \quad (\text{S29})$$

$$d_{2,\infty}((U_1, V_1), (U_2, V_2)) := \|U_1 - U_2\|_{2,\infty} + \|V_1 - V_2\|_{2,\infty}, \quad (\text{S30})$$

then we have that

$$\mathbb{P}(|E_n(U, V) - E_n(\tilde{U}, \tilde{V})| \geq u) \quad (\text{S31})$$

$$\leq 2 \exp \left( - \min \left\{ \frac{u^2}{128 \rho_n^{-1} n^{-4} A_F^2 d_F((U, V), (\tilde{U}, \tilde{V}))^2}, \frac{u}{16 \rho_n^{-1} n^{-2} A_{2,\infty} d_{2,\infty}((U, V), (\tilde{U}, \tilde{V}))} \right\} \right). \quad (\text{S32})$$

As a result of Corollary S22, it therefore follows that

$$\sup_{(U,V),(\tilde{U},\tilde{V}) \in T \times T} |E_n(U, V) - E_n(\tilde{U}, \tilde{V})| = O_p \left( A_{2,\infty}^2 \left( \frac{d}{n \rho_n} \right)^{1/2} + A_{2,\infty}^2 \frac{d}{n \rho_n} \right) \quad (\text{S33})$$

The desired conclusion follows by combining the bounds (S24) and (S33).  $\square$

For the more abstract node2vec case under Scenario (ii), we highlight that we can take

$$E_n(U, V) = \frac{1}{n^2} \sum_{i \neq j} \rho_n f_{\mathcal{P}}(\lambda_i, \lambda_j) \left( \rho_n^{-1} a_{ij} - W(\lambda_i, \lambda_j) \right) \cdot (-\log \sigma(\langle u_i, v_j \rangle)). \quad (\text{S34})$$

Now, as  $f_{\mathcal{P}}(\lambda_u, \lambda_v)$  is a function of the community assignments only within the SBM case, we can replace this by a matrix of constants  $f_{\mathcal{P},c,c'}$  for  $c, c' \in [\kappa]$ , and therefore the error term can be decomposed into a sum

$$\sum_{c_1, c_2} (\rho_n f_{\mathcal{P},c_1,c_2}) \sum_{\substack{i \neq j \\ i:c(u)=c_1 \\ j:c(u)=c_2}} \left( \rho_n^{-1} a_{ij} - W(\lambda_i, \lambda_j) \right) \cdot (-\log \sigma(\langle u_i, v_j \rangle)), \quad (\text{S35})$$

where we recall that  $\max_{c_1, c_2} (\rho_n f_{\mathcal{P},c_1,c_2}) < \infty$  as guaranteed by Theorem S1. Each of these terms (of which there are finitely many) can be controlled using the exact same argument as in Theorem S5, and so the conclusion of the Theorem also holds with the same overall rate of convergence in Scenario (ii).

#### C.4 Adding in a diagonal term

Currently the sum in  $\mathbb{E}[\hat{\mathcal{L}}_n(U, V) | \lambda]$  is defined only terms  $i, j$  with  $i \neq j$  - it is more convenient to work with the version where the diagonal term is added in:

$$\mathcal{R}_n(U, V) := \frac{1}{n^2} \sum_{i,j \in [n]} \left\{ -f_{\mathcal{P}}(\lambda_i, \lambda_j) \rho_n W(\lambda_u, \lambda_v) \log(\sigma(\langle u_i, v_j \rangle)) \right. \quad (\text{S36})$$

$$\left. -f_{\mathcal{N}}(\lambda_i, \lambda_j) \log(1 - \sigma(\langle u_i, v_j \rangle)) \right\}. \quad (\text{S37})$$

We show that this does not significantly change the size of the loss function.

**Lemma S6.** *With the same notation as in Theorem S5, we have that*

$$\begin{aligned} \sup_{U, V \in B_{2,\infty}(A_{2,\infty})} |\mathcal{R}_n(U, V) - \mathbb{E}[\hat{\mathcal{L}}_n(U, V) | \lambda]| \\ = O_p \left( \frac{1}{n} A_{2,\infty}^2 \left( \|\rho_n f_{\mathcal{P}}(\lambda, \lambda') W(\lambda, \lambda')\|_{\infty} + \|f_{\mathcal{N}}(\lambda, \lambda')\|_{\infty} \right) \right). \end{aligned}$$

In particular, in the case of DeepWalk we have that

$$\sup_{U, V \in B_{2,\infty}(A_{2,\infty})} |\mathcal{R}_n(U, V) - \mathbb{E}[\hat{\mathcal{L}}_n(U, V) | \lambda]| = O_p \left( \frac{1}{n} A_{2,\infty}^2 \left( \frac{2k \|W\|_{\infty}}{\mathcal{E}_W(1)} + \frac{2l(k+1) \|W\|_{\infty}^2}{\mathcal{E}_W(1) \mathcal{E}_W(\alpha)} \right) \right).$$

707 *Proof.* Begin by noting that

$$\begin{aligned} 0 &\leq \mathcal{R}_n(U, V) - \mathbb{E}[\widehat{\mathcal{L}}_n(U, V) \mid \lambda] \\ &= \frac{1}{n^2} \sum_{i=1}^n \left\{ -f_{\mathcal{P}}(\lambda_i, \lambda_j) \rho_n W(\lambda_u, \lambda_v) \log(\sigma(\langle u_i, v_i \rangle)) - f_{\mathcal{N}}(\lambda_i, \lambda_j) \log(1 - \sigma(\langle u_i, v_i \rangle)) \right\}. \end{aligned} \quad (\text{S38})$$

708 Note that we can bound

$$-\log(\sigma(\langle u_i, v_i \rangle)) \leq |\langle u_i, v_i \rangle| \leq \|u_i\|_2 \|v_i\|_2 \quad (\text{S39})$$

709 and similarly  $-\log(1 - \sigma(\langle u_i, v_i \rangle)) \leq |\langle u_i, v_i \rangle| \leq \|u_i\|_2 \|v_i\|_2$ . Moreover, we have the bounds

$$f_{\mathcal{P}}(\lambda_i, \lambda_j) \rho_n W(\lambda_i, \lambda_j) \leq \|\rho_n f_{\mathcal{P}}(\lambda, \lambda') W(\lambda, \lambda')\|_{\infty} < \infty, f_{\mathcal{N}}(\lambda_i, \lambda_j) \leq \|f_{\mathcal{N}}(\lambda, \lambda')\|_{\infty} < \infty \quad (\text{S40})$$

710 under our assumptions. As a result, because  $U, V \in \mathcal{B}_{2,\infty}(A_{2,\infty})$ , we end up with the final bound

$$|\mathcal{R}_n(U, V) - \mathbb{E}[\widehat{\mathcal{L}}_n(U, V) \mid \lambda]| \leq \frac{1}{n} A_{2,\infty}^2 \left( \|\rho_n f_{\mathcal{P}}(\lambda, \lambda') W(\lambda, \lambda')\|_{\infty} + \|f_{\mathcal{N}}(\lambda, \lambda')\|_{\infty} \right) \quad (\text{S41})$$

711 which gives the stated result as the RHS is free of  $U$  and  $V$ .  $\square$

## 712 C.5 Chaining up the loss function approximations

713 By chaining up the prior results, we end up with the following result:

714 **Proposition S7.** *There exists a non-empty set  $\Psi_n$  for each  $n$  such that, for any set  $X \subseteq \mathbb{R}^{n \times d} \times \mathbb{R}^{n \times d}$*   
 715 *containing  $0_{n \times d} \times 0_{n \times d}$ , we have for DeepWalk that*

$$\sup_{(U,V) \in \Psi_n \cap B_{2,\infty}(A_{2,\infty})} |\mathcal{L}_n(U, V) - \mathcal{R}_n(U, V)| = O_p \left( \left( \frac{\log n}{n \rho_n} \right)^{1/2} + A_{2,\infty}^2 \left( \frac{d}{n \rho_n} \right)^{1/2} \right) \quad (\text{S42})$$

716 and

$$\begin{aligned} \mathbb{P} \left( \arg \min_{(U,V) \in B_{2,\infty}(A_{2,\infty}) \cap X} \mathcal{L}_n(U, V) \text{cup} \arg \min_{(U,V) \in B_{2,\infty}(A_{2,\infty}) \cap X} \mathcal{R}_n(U, V) \subseteq \Psi_n \cap B_{2,\infty}(A_{2,\infty}) \cap X \right) \\ = 1 - o(1). \end{aligned} \quad (\text{S43})$$

717 For node2vec, the same result holds when we replace the  $(\log n / n \rho_n)^{1/2}$  term with an  $o_p(1)$  term  
 718 and add the constraint that  $d \ll n \rho_n$ . The same result also holds when we constrain  $U = V$ , but  
 719 otherwise keep everything else unchanged.

## 720 C.6 Minimizers of $\mathcal{R}_n(U, V)$

721 Recall that we have earlier defined

$$\begin{aligned} \mathcal{R}_n(U, V) := \frac{1}{n^2} \sum_{i,j \in [n]} \left\{ -f_{\mathcal{P}}(\lambda_i, \lambda_j) \rho_n W(\lambda_u, \lambda_v) \log(\sigma(\langle u_i, v_j \rangle)) \right. \\ \left. - f_{\mathcal{N}}(\lambda_i, \lambda_j) \log(1 - \sigma(\langle u_i, v_j \rangle)) \right\}. \end{aligned} \quad (\text{S44})$$

722 We now want to reason about the minima of these functions. To do so, note that the optimization  
 723 domain is non-convex - firstly due to the rank constraints on the matrix  $UV^T$ , and secondly due to  
 724 the fact that the loss function is invariant to any mapping  $(U, V) \rightarrow (UM, VM^{-1})$  for any invertible  
 725  $d \times d$  matrix  $M$ . To handle the second part, we consider the global minima of this function when  
 726 parameterized only in term of the matrix  $UV^T$ . We will then see that the minima matrix is already  
 727 low rank.

728 We first begin by giving some basic facts about the function  $\mathcal{R}_n(U, V)$  when parameterized as a  
 729 function of  $UV^T$ .

730 **Lemma S8.** *Define the modified function*

$$\mathcal{R}_n(M) := \frac{1}{n^2} \sum_{i,j \in [n]} \left\{ -f_{\mathcal{P}}(\lambda_i, \lambda_j) \rho_n W(\lambda_u, \lambda_v) \log(\sigma(M_{ij})) - f_{\mathcal{N}}(\lambda_i, \lambda_j) \log(1 - \sigma(M_{ij})) \right\}. \quad (\text{S45})$$

731 *over all matrices  $M \in \mathbb{R}^{n \times n}$ . Then we have the following:*

732 a) The function  $\mathcal{R}_n(M)$  is strictly convex in  $M$ .

733 b) The global minimizer of  $\mathcal{R}_n(M)$  is given by

$$M_{ij}^* = \log \left( \frac{f_{\mathcal{P}}(\lambda_i, \lambda_j) \rho_n W(\lambda_i, \lambda_j)}{f_{\mathcal{N}}(\lambda_i, \lambda_j)} \right) \quad (\text{S46})$$

734 and satisfies  $\nabla_M \mathcal{R}_n(M) = 0$ .

735 c) When restricted to a cone of semi-positive definite matrices  $M \in \mathcal{M}_n^{\geq 0}$ , there exists a unique  
 736 minimizer to  $\mathcal{R}_n(M)$  over this set, which we call  $M^{\geq 0}$ . Moreover,  $M^{\geq 0}$  has the property  
 737 that  $\langle \nabla_M \mathcal{R}_n(M^{\geq 0}), M^{\geq 0} - M \rangle \leq 0$  for all  $M \in \mathcal{M}_n^{\geq 0}$ .

738 *Proof.* For part a), this follows by the fact that the functions  $-\log(\sigma(x))$  and  $-\log(1 - \sigma(x))$  are  
 739 positive and strictly convex functions of  $x \in \mathbb{R}$ , the fact that  $f_{\mathcal{P}}(\lambda_i, \lambda_j) \rho_n W(\lambda_i, \lambda_j)$  and  $f_{\mathcal{N}}(\lambda_i, \lambda_j)$   
 740 are positive quantities which are bounded above (see e.g Lemma S6), and the fact that the sum of  
 741 strictly convex functions is strictly convex. For part b), this follows by noting that each of the  $M_{ij}^*$   
 742 are pointwise minima of the functions

$$r_{ij}(x) = -f_{\mathcal{P}}(\lambda_i, \lambda_j) \rho_n W(\lambda_i, \lambda_j) \log(\sigma(x)) - f_{\mathcal{N}}(\lambda_i, \lambda_j) \log(1 - \sigma(x)) \quad (\text{S47})$$

743 defined over  $x \in \mathbb{R}$ . Indeed, note that

$$\frac{dr_{ij}}{dx} = (-1 + \sigma(x)) f_{\mathcal{P}}(\lambda_i, \lambda_j) \rho_n W(\lambda_i, \lambda_j) + \sigma(x) f_{\mathcal{N}}(\lambda_i, \lambda_j), \quad (\text{S48})$$

744 so setting this equal to zero, rearranging and making use of the equality  $\sigma^{-1}(a/(a+b)) = \log(a/b)$   
 745 gives the stated result. Part c) is a consequence of strong convexity, the optimization domain being  
 746 convex and self dual, and the KKT conditions.  $\square$

747 To understand the form of the the global minimizer of  $\mathcal{R}_n(M)$  in the DeepWalk case, by substituting  
 748 in the values for  $f_{\mathcal{P}}(\lambda_i, \lambda_j)$  and  $f_{\mathcal{N}}(\lambda_i, \lambda_j)$  we end up with

$$M_{ij}^* = \log \left( \frac{2P_{c(i),c(j)} \mathcal{E}_W(\alpha)}{(1+k^{-1})\mathbb{E}[\theta]\mathbb{E}[\theta]^\alpha (\theta_j^{\alpha-1} \tilde{P}_{c(i)}^\alpha \tilde{P}_{c(j)}^\alpha + \theta_i^{\alpha-1} \tilde{P}_{c(i)}^\alpha \tilde{P}_{c(j)}^\alpha)} \right) \quad (\text{S49})$$

$$= \log \left( \frac{2\mathcal{E}_W(\alpha)}{(1+k^{-1})\mathbb{E}[\theta]\mathbb{E}[\theta]^\alpha} \cdot \frac{P_{c(i),c(j)}}{\tilde{P}_{c(i)} \tilde{P}_{c(j)} \cdot (\theta_i^{\alpha-1} \tilde{P}_{c(i)}^{\alpha-1} + \theta_j^{\alpha-1} \tilde{P}_{c(j)}^{\alpha-1})} \right) \quad (\text{S50})$$

749 In particular, from the above formula we get the following lemma as a consequence:

750 **Lemma S9.** Suppose that Scenarios (i) or (iii) holds, so that either a)  $\theta_i$  is constant for all  $i$ , or  
 751 b)  $\alpha = 1$ . Then if we write  $\Pi_C \in \mathbb{R}^{n \times \kappa}$  for the matrix where  $(\Pi_C)_{il} = 1[c(i) = l]$ , and define the  
 752 matrix

$$(\tilde{M}_\alpha^*)_{lm} = \log \left( \frac{2\mathcal{E}_W(\alpha)}{(1+k^{-1})\mathbb{E}[\theta]\mathbb{E}[\theta]^\alpha} \cdot \frac{P_{lm}}{\tilde{P}_m \tilde{P}_l^\alpha + \tilde{P}_m^\alpha \tilde{P}_l} \right) \text{ for } l, m \in [\kappa], \quad (\text{S51})$$

753 then we have that  $M^* = \Pi_C \tilde{M}_\alpha^* \Pi_C^T$ . In particular, as soon as the matrix  $\Pi_C$  is of full rank (which  
 754 occurs with asymptotic probability 1), then the rank of  $M^*$  equals the rank of  $\tilde{M}_\alpha^*$ . Moreover, as  
 755 soon as  $d$  is greater than or equal to the rank of  $\tilde{M}_\alpha^*$ ,  $(U, V)$  is a minimizer of  $\mathcal{R}_n(U, V)$  if and only  
 756 if  $UV^T = M^*$ .

757 Under Scenario (ii), the same result applies noting that  $f_{\mathcal{P}}$  and  $f_{\mathcal{N}}$  are functions only of the underling  
 758 communities, and so if we abuse notation and write e.g  $f_{\mathcal{P}}(l, m)$  to indicate the value of  $f_{\mathcal{P}}(\lambda_i, \lambda_j)$   
 759 when  $c(i) = l$  and  $c(j) = m$ , one can take

$$(\tilde{M}^*)_{lm} = \log \left( \frac{f_{\mathcal{P}}(l, m) \rho_n P_{l,m}}{f_{\mathcal{N}}(l, m)} \right) \quad (\text{S52})$$

760 and have the above result hold.

761 We discuss in Appendix F what happens when we apply DeepWalk in the DCSBM regime when  $\alpha \neq 1$ .  
 762 To give an example of what  $M^*$  looks like, we write it down in the case of a SBM( $n, \kappa, \tilde{p}, \tilde{q}, \rho_n$ )  
 763 model, which is frequently used to illustrate the behavior of various community detection algorithms.  
 764 Such a model assumes that the community assignments  $\pi_l = 1/\kappa$  for all  $l \in [\kappa]$ , and that

$$P_{kl} = \begin{cases} \tilde{p} & \text{if } k = l, \\ \tilde{q} & \text{if } k \neq l. \end{cases} \quad (\text{S53})$$

765 In this case, we have that

$$\tilde{P}_l = \frac{\tilde{p} + \kappa(\tilde{q} - 1)}{\kappa} \text{ for } l \in [\kappa], \quad \mathcal{E}_W(\alpha) = \mathbb{E}[\theta]^\alpha \mathbb{E}[\theta^\alpha] \cdot \left( \frac{\tilde{p} + (\kappa - 1)\tilde{q}}{\kappa} \right)^\alpha. \quad (\text{S54})$$

766 Substituting these values into the matrix  $\tilde{M}_\alpha^*$  gives

$$(\tilde{M}_\alpha^*)_{lm} = \log \left( \frac{\mathbb{E}[\theta^\alpha]}{\mathbb{E}[\theta](1 + k^{-1})} \cdot \frac{\kappa \tilde{p}}{\tilde{p} + (\kappa - 1)\tilde{q}} \right) \delta_{lm} + \log \left( \frac{\mathbb{E}[\theta^\alpha]}{\mathbb{E}[\theta](1 + k^{-1})} \cdot \frac{\kappa \tilde{q}}{\tilde{p} + (\kappa - 1)\tilde{q}} \right) (1 - \delta_{lm}). \quad (\text{S55})$$

767 We highlight this is a matrix of the form  $\alpha \delta_{lm} + \beta(1 - \delta_{lm})$ , and so it is straightforward to describe  
 768 the spectral behavior of the matrix (see Lemma S31).

### 769 C.6.1 Minimizers in the constrained regime $U = V$

770 In the case where we have constrained  $U = V$ , it is not possible in general to write down the closed  
 771 form of the minimizer of  $\mathcal{R}_n(M)$  over  $\mathcal{M}_n^{\geq 0}$ . However, it is still possible to draw enough conclusions  
 772 about the form of the minimizer in order to give guarantees for community detection. We begin  
 773 with the proposition below. We state the next two results for DeepWalk only, but note that the first  
 774 generalizes to the node2vec case immediately.

775 **Proposition S10.** Suppose that  $\theta_i$  is constant across all  $i$ . Supposing that  $\tilde{M} \in \mathbb{R}^{\kappa \times \kappa}$  is of the form  
 776  $\tilde{M} = \tilde{U} \tilde{U}^T$  for matrices  $\tilde{U} \in \mathbb{R}^{\kappa \times d}$ , define the function

$$\tilde{\mathcal{R}}_n(\tilde{M}) = \sum_{l, m \in [\kappa]} \hat{p}_n(l) \hat{p}_n(m) \left\{ -2k P_{lm} \log \sigma(\langle u_l, u_m \rangle) - \{ \tilde{P}_l \tilde{P}_m^\alpha + \tilde{P}_m \tilde{P}_l^\alpha \} \log(1 - \sigma(\langle u_l, u_m \rangle)) \right\} \quad (\text{S56})$$

777 where we define  $\hat{p}_n(l) := n^{-1} |\{i : c(i) = l\}|$  for  $l \in [\kappa]$ . Then  $\tilde{\mathcal{R}}_n(\tilde{M})$  is strongly convex, and  
 778 moreover has a unique minimizer as soon as  $d \geq \kappa$ .

779 Moreover, any minimizer of  $\mathcal{R}_n(M)$  over matrices  $M$  of the form  $M = UU^T$  where  $U \in \mathbb{R}^{n \times d}$  must  
 780 take the form  $M = \Pi_C M^* \Pi_C^T$  where  $(\Pi_C)_{il} = 1[c(i) = l]$  where  $M^*$  is a minimizer of  $\tilde{\mathcal{R}}_n(\tilde{M})$ . In  
 781 particular, once  $d \geq \kappa$ , there is a unique minimizer to  $\mathcal{R}_n(M)$ .

782 *Proof.* The properties of  $\tilde{\mathcal{R}}_n(\tilde{M})$  are immediate by similar arguments to Lemma S8 and standard  
 783 facts in convex analysis. We begin by noting that if we substitute in the values

$$\rho_n W(\lambda_i, \lambda_j) f_{\mathcal{P}}(\lambda_i, \lambda_j) = \frac{2k P_{c(i), c(j)}}{\mathcal{E}_W(1)}, \quad (\text{S57})$$

$$f_{\mathcal{N}}(\lambda_i, \lambda_j) = \frac{l(k+1)}{\mathcal{E}_W(1) \mathcal{E}_W(\alpha)} (\tilde{P}_{c(i)} \tilde{P}_{c(j)}^\alpha + \tilde{P}_{c(j)} \tilde{P}_{c(i)}^\alpha), \quad (\text{S58})$$

784 for  $f_{\mathcal{P}}(\lambda_i, \lambda_j)$  and  $f_{\mathcal{N}}(\lambda_i, \lambda_j)$ , then we can write that (recalling that  $M_{ij} = \langle u_i, u_j \rangle$ )

$$\mathcal{R}_n(M) := \frac{1}{n^2} \sum_{i, j \in [n]} \left\{ -2k P_{c(i), c(j)} \log \sigma(\langle u_i, u_j \rangle) \right. \quad (\text{S59})$$

$$\left. - \frac{l(k+1)}{\mathcal{E}_W(1) \mathcal{E}_W(\alpha)} (\tilde{P}_{c(i)} \tilde{P}_{c(j)}^\alpha + \tilde{P}_{c(j)} \tilde{P}_{c(i)}^\alpha) \log(1 - \sigma(\langle u_i, u_j \rangle)) \right\} \quad (\text{S60})$$

$$:= \sum_{l, m \in [\kappa]} \hat{p}_n(l) \hat{p}_n(m) \left\{ -2k P_{lm} \frac{1}{|\mathcal{C}_l| |\mathcal{C}_m|} \sum_{i \in \mathcal{C}_l, j \in \mathcal{C}_m} \log \sigma(\langle u_i, u_j \rangle) \right. \quad (\text{S61})$$

$$\left. - \{ \tilde{P}_{c(i)} \tilde{P}_{c(j)}^\alpha + \tilde{P}_{c(j)} \tilde{P}_{c(i)}^\alpha \} \frac{1}{|\mathcal{C}_l| |\mathcal{C}_m|} \sum_{i \in \mathcal{C}_l, j \in \mathcal{C}_m} \log(1 - \sigma(\langle u_i, u_j \rangle)) \right\} \quad (\text{S62})$$

785 where for  $l \in [\kappa]$  we define  $\hat{p}_n(l) := n^{-1}|\{i : c(i) = l\}|$ , along with the sets  $\mathcal{C}_l = \{i : c(i) = l\}$ .  
 786 Now, note that as the functions  $-\log(\sigma(x))$  and  $-\log(1 - \sigma(x))$  are strictly convex, by Jensen's  
 787 inequality we have that e.g

$$\frac{1}{|\mathcal{C}_l||\mathcal{C}_m|} \sum_{i \in \mathcal{C}_l, j \in \mathcal{C}_m} -\log \sigma(\langle u_i, u_j \rangle) \geq -\log \sigma\left(\left\langle \frac{1}{|\mathcal{C}_l|} \sum_{i \in \mathcal{C}_l} u_i, \frac{1}{|\mathcal{C}_m|} \sum_{j \in \mathcal{C}_m} u_j \right\rangle\right) \quad (\text{S63})$$

788 (where we also used bilinearity of the inner product) where equality holds above if and only if the  
 789  $u_i$  are constant across all indices  $i$ . In particular, any minimizer of  $\mathcal{R}_n(M)$  must have the  $u_i$   
 790 constant across  $i \in \mathcal{C}_l$  for each  $l \in [\kappa]$ , which defines the function  $\tilde{\mathcal{R}}_n(\tilde{M})$ . This gives the claimed  
 791 statement.  $\square$

792 In certain cases, we are able to give a closed form to the minimizer. We illustrate this for the case of  
 793 the  $\text{SBM}(n, \kappa, \tilde{p}, \tilde{q}, \rho_n)$  model.

794 **Proposition S11.** *Let  $\tilde{M}^*$  be the unique minimizer of  $\tilde{\mathcal{R}}_n(\tilde{M})$  as introduced in Proposition S10.*  
 795 *In the case of a  $\text{SBM}(n, \kappa, \tilde{p}, \tilde{q}, \rho_n)$  model, we have that  $\kappa^{-2}\|\tilde{M}^* - M^*\|_1 = O_p((\kappa \log \kappa/n)^{1/4})$ ,*  
 796 *where  $M^*$  is of the form*

$$(M^*)_{ij} = \alpha^* \delta_{ij} - \frac{\alpha^*}{\kappa - 1} (1 - \delta_{ij}) \quad (\text{S64})$$

797 for some  $\alpha^* = \alpha^*(\tilde{p}, \tilde{q}) \geq 0$ . Moreover,  $\alpha^* > 0$  iff  $\tilde{p} > \tilde{q}$ .

798 *Proof.* We begin by arguing that the objective function  $\tilde{\mathcal{R}}_n(\tilde{M})$  converges uniformly to the objective

$$\bar{\mathcal{R}}_n(\tilde{M}) := \frac{1}{\kappa^2} \sum_{l, m \in [\kappa]} \left\{ -2k P_{lm} \log \sigma(\langle u_l, u_m \rangle) - \{ \tilde{P}_m \tilde{P}_l^\alpha + \tilde{P}_l \tilde{P}_m^\alpha \} \log(1 - \sigma(\langle u_l, u_m \rangle)) \right\} \quad (\text{S65})$$

799 over a set containing the minimizers of both functions. Note that this function is also strictly convex,  
 800 and has a unique minimizer as soon as  $d \geq \kappa$ . To do so, we highlight that as we have that

$$\max_{k \neq l} \left| \frac{\hat{p}_n(l) \hat{p}_n(k) - \kappa^{-2}}{\kappa^{-2}} \right| = O_p\left(\left(\frac{\kappa \log \kappa}{n}\right)^{1/2}\right) \quad (\text{S66})$$

801 by standard concentration results for Binomial random variables (e.g Proposition 47 of [11]), it  
 802 follows that

$$|\bar{\mathcal{R}}_n(\tilde{M}) - \tilde{\mathcal{R}}_n(\tilde{M})| \leq \bar{\mathcal{R}}_n(\tilde{M}) \cdot O_p\left(\left(\frac{\kappa \log \kappa}{n}\right)^{1/2}\right). \quad (\text{S67})$$

803 Consequently,  $\tilde{\mathcal{R}}_n(\tilde{M})$  converges to  $\bar{\mathcal{R}}_n(\tilde{M})$  uniformly over any level set of  $\bar{\mathcal{R}}_n(\tilde{M})$ , which neces-  
 804 sarily contains the minima of  $\bar{\mathcal{R}}_n(\tilde{M})$ . If one does so over the set (for example)

$$A = \{\tilde{M} : \bar{\mathcal{R}}_n(\tilde{M}) \leq 10\bar{\mathcal{R}}_n(0)\} \quad (\text{S68})$$

805 (for example), then as  $\bar{\mathcal{R}}_n(0)$  is constant across  $n$ , we have uniform convergence of (S67) over the set  
 806  $A$  at a rate of  $O_p((\log \kappa/np)^{1/2})$ . This argument can be reversed, which therefore ensures uniform  
 807 convergence (over the same set) which contains the minimizers (with the minimizer of  $\tilde{\mathcal{R}}_n(M)$  being  
 808 contained within this set with asymptotic probability 1) at a rate of  $O_p((\kappa \log \kappa/n)^{1/2})$ .

809 With this, we note that an application of Lemma S33 gives that for any matrices  $\tilde{M}_1$  and  $\tilde{M}_2$  we have  
 810 that

$$\bar{\mathcal{R}}_n(\tilde{M}_1) \geq \bar{\mathcal{R}}_n(\tilde{M}_2) + \langle \Delta \bar{\mathcal{R}}_n(\tilde{M}_2), \tilde{M}_1 - \tilde{M}_2 \rangle \quad (\text{S69})$$

$$+ \frac{C}{\kappa^2} \sum_{i, j \in [\kappa]} \min\{ |(\tilde{M}_2)_{ij} - (\tilde{M}_1)_{ij}|^2, 2|(\tilde{M}_2)_{ij} - (\tilde{M}_1)_{ij}| \}. \quad (\text{S70})$$

811 where to save on notation, we define

$$C := \frac{1}{4} e^{-\|\tilde{M}_2\|_\infty} \min_{l, m} \{ 2k P_{lm}, \tilde{P}_m \tilde{P}_l^\alpha \}. \quad (\text{S71})$$

812 In particular, if  $\widetilde{M}_2 = \bar{M}^*$  is an optimum of  $\bar{\mathcal{R}}_n(\widetilde{M})$ , then by the KKT conditions (similarly as in  
813 Lemma S8) we have that

$$\bar{\mathcal{R}}_n(\widetilde{M}_1) - \bar{\mathcal{R}}_n(\bar{M}^*) \geq \frac{C}{\kappa^2} \sum_{i,j \in [\kappa]} \min\{ |(\bar{M}^*)_{ij} - (\widetilde{M}_1)_{ij}|^2, 2|(\bar{M}^*)_{ij} - (\widetilde{M}_1)_{ij}| \}. \quad (\text{S72})$$

814 In particular, if we then let  $\widetilde{M}^*$  be any minimizer of  $\bar{\mathcal{R}}_n(\widetilde{M})$ , then we have that

$$\frac{C}{\kappa^2} \sum_{i,j \in [\kappa]} \min\{ |(\bar{M}^*)_{ij} - (\widetilde{M}_1)_{ij}|^2, 2|(\bar{M}^*)_{ij} - (\widetilde{M}_1)_{ij}| \} \quad (\text{S73})$$

$$\leq \bar{\mathcal{R}}_n(\widetilde{M}_1) - \bar{\mathcal{R}}_n(\bar{M}^*) \leq \bar{\mathcal{R}}_n(\widetilde{M}_1) - \bar{\mathcal{R}}_n(\bar{M}^*) + \bar{\mathcal{R}}_n(\bar{M}^*) - \bar{\mathcal{R}}_n(\bar{M}^*) \quad (\text{S74})$$

$$\leq 2 \sup_{M \in A} |\bar{\mathcal{R}}_n(M) - \bar{\mathcal{R}}_n(\bar{M}^*)| \quad (\text{S75})$$

815 on an event of asymptotic probability 1. Consequently, it follows by Lemma S34 that

$$\frac{1}{\kappa^2} \|\bar{M}^* - \widetilde{M}^*\|_1 = O_p((\kappa \log \kappa/n)^{1/4}). \quad (\text{S76})$$

816 We now need to find the minimizing positive semi-definite matrix which optimizes  $\bar{\mathcal{R}}_n(\widetilde{M})$ . To do  
817 so, we will argue that one can find  $\alpha$  for which

$$\widehat{M}_{ij} = \alpha \delta_{ij} - \frac{\alpha}{\kappa - 1} (1 - \delta_{ij}), \quad \nabla \bar{\mathcal{R}}_n(\widehat{M}) = C 1_\kappa 1_\kappa^T, \quad 1_\kappa = (1, \dots, 1)^T$$

818 for some positive constant  $C$ , as then the KKT conditions for the constrained optimization prob-  
819 lem will hold. Indeed, for any positive definite matrix  $M$ , as by definition of  $\widehat{M}$  we have  
820 that  $\langle \nabla \bar{\mathcal{R}}_n(\widehat{M}), \widehat{M} \rangle = 0$  as all of the eigenvectors of  $\widehat{M}$  are orthogonal to the unit vector  $1_\kappa$   
821 (Lemma S31). It consequently follows that as  $\nabla \bar{\mathcal{R}}_n(\widehat{M})$  is itself positive definite, we get that  
822  $\langle -\nabla \bar{\mathcal{R}}_n(\widehat{M}), \widehat{M} - M \rangle = \langle \nabla \bar{\mathcal{R}}_n(\widehat{M}), M \rangle \geq 0$ . We now need to verify the existence of a constant  $\alpha$   
823 for which this condition holds. We note that as  $\widehat{M}_{ij}$  is constant across  $i = j$ , and also constant across  
824  $i \neq j$ , to verify the condition that  $\nabla \bar{\mathcal{R}}_n(\widehat{M})$  is proportional to  $1_\kappa 1_\kappa^T$ , it suffices to check whether the  
825 on and off diagonal terms of  $\nabla \bar{\mathcal{R}}_n(\widehat{M})$  are equal to each other. This gives the equation

$$\begin{aligned} \sigma(\alpha) \cdot \left( k\tilde{p} + l(k+1) \frac{\tilde{p} + (\kappa-1)\tilde{q}}{\kappa} \right) \\ = k(\tilde{p} - \tilde{q}) + \sigma(-\alpha/(\kappa-1)) \left( k\tilde{q} + l(k+1) \frac{\tilde{p} + (\kappa-1)\tilde{q}}{\kappa} \right) \end{aligned}$$

826 By applying Lemma S32, this has a singular positive solution in  $\alpha$  if and only if  $k(\tilde{p} - \tilde{q}) \geq k(\tilde{p} - \tilde{q})/2$ ,  
827 which holds iff  $\tilde{p} \geq \tilde{q}$ . In the case where  $\tilde{p} < \tilde{q}$ , it follows that the solution has  $\alpha = 0$ .  $\square$

## 828 C.7 Strong convexity properties of the minima matrix

829 **Proposition S12.** Define the modified function

$$\mathcal{R}_n(M) := \frac{1}{n^2} \sum_{i,j \in [n]} \left\{ -f_{\mathcal{P}}(\lambda_i, \lambda_j) \rho_n W(\lambda_u, \lambda_v) \log(\sigma(M_{ij})) - f_{\mathcal{N}}(\lambda_i, \lambda_j) \log(1 - \sigma(M_{ij})) \right\}. \quad (\text{S77})$$

830 over all matrices  $M \in \mathbb{R}^{n \times n}$ . Then we have for any matrices  $M_1, M_2 \in \mathbb{R}^{n \times n}$  with  
831  $\|M_1\|_\infty, \|M_2\|_\infty \leq A_\infty$  that

$$\mathcal{R}_n(M_1) \geq \mathcal{R}_n(M_2) + \langle \nabla \mathcal{R}_n(M_2), M_1 - M_2 \rangle + \frac{\tilde{C} e^{-A_\infty}}{2} \cdot \frac{1}{n^2} \|M_1 - M_2\|_F^2 \quad (\text{S78})$$

832 where  $\tilde{C} = \min_{l,m} \{2k P_{l,m}, \tilde{P}_l^\alpha \tilde{P}_m\}$  for Scenarios (i) and (iii), and  $\tilde{C} =$   
833  $\min\{\|\rho_n f_{\mathcal{P}}(\lambda, \lambda')\|_{-\infty}, \|f_{\mathcal{N}}(\lambda, \lambda')\|_{-\infty}\} > 0$  for Scenario (ii). Moreover,

834 i) If  $\mathcal{R}_n(M)$  is constrained over a set  $\mathcal{X} = \{M = UV^T : U, V \in \mathbb{R}^{n \times d}, \|M\|_\infty \leq A_\infty\}$ ,  
835 and there exists  $M^*$  in  $\mathcal{X}$  such that  $\nabla \mathcal{R}_n(M^*) = 0$ , then we have that

$$\frac{1}{n^2} \|M^* - M\|_F^2 \leq 2\tilde{C}^{-1} e^{A_\infty} \cdot (\mathcal{R}_n(M) - \mathcal{R}_n(M^*)) \text{ for all } M \in \mathcal{X}. \quad (\text{S79})$$

836 ii) If  $\mathcal{R}_n(M)$  is constrained over a set  $\mathcal{X}^{\geq 0} = \{M = UU^T : U \in \mathbb{R}^{n \times d}, \|M\|_{\infty} \leq A_{\infty}\}$ ,  
 837 and there exists  $M^*$  in  $\mathcal{X}^{\geq 0}$  such that  $\langle \nabla \mathcal{R}_n(M^*), M - M^* \rangle \geq 0$  for all  $M \in \mathcal{X}^{\geq 0}$ , then  
 838 we get the same inequality as in part i) above.

839 *Proof.* The first inequality follows by an application of Lemma S33, with the second and third parts  
 840 following by applying the conditions stated and rearranging.  $\square$

## 841 C.8 Convergence of the gram matrices of the embeddings

842 By combining together Proposition S12 and Proposition S7 we end up with the following result:

843 **Theorem S13.** Suppose that the conditions of Lemma S9 hold. (In particular, recall that  $d \geq \kappa$ .)  
 844 Then there exist constants  $A_{\infty}$  and  $A_{2,\infty}$  (depending on the parameters of the model and sampling  
 845 scheme) and a matrix  $M^* \in \mathbb{R}^{\kappa \times \kappa}$  (also depending on the parameters of the model and the sampling  
 846 scheme) such that for any minimizer  $(U^*, V^*)$  of  $\mathcal{L}(U, V)$  over the set

$$X = \{(U, V) : \|U\|_{\infty}, \|V\|_{\infty} \leq A_{\infty}, \|U\|_{2,\infty}, \|V\|_{2,\infty} \leq A_{2,\infty}\}, \quad (\text{S80})$$

847 we have that

$$\frac{1}{n^2} \sum_{i,j \in [n]} (\langle u_i^*, v_j^* \rangle - M_{c(i),c(j)}^*)^2 = C \cdot \begin{cases} O_p((\frac{\max\{\log n, d\}}{n\rho_n})^{1/2}) & \text{under Scenarios (i) and (iii);} \\ o_p(1) & \text{under Scenario (ii);} \end{cases} \quad (\text{S81})$$

848 for some constant  $C$  depending on the model, the node2vec hyperparameters,  $A_{\infty}$  and  $A_{2,\infty}$ . In the  
 849 case where we constrain  $U = V$ , the same result holds provided the conditions of Proposition S10  
 850 hold.

851 *Proof.* We note that by Lemma S9, there exists a minimizer  $\widetilde{M}^*$  for  $\mathcal{R}_n(M)$  of the form  $\widetilde{M}^* =$   
 852  $\Pi M^* \Pi^T$  for a matrix  $M^* \in \mathbb{R}^{\kappa \times \kappa}$ . We can then take  $A_{\infty}$  and  $A_{2,\infty}$  as  $2\|M^*\|_{\infty}$  and  $2\|M^*\|_{2,\infty}$ .  
 853 We highlight that we can do this even when  $d > \kappa$ , as we can embed  $M^*$  into the block diagonal  
 854 matrix  $\text{diag}(M^*, O_{d-\kappa, d-\kappa})$ , which preserves both the norms above. Lemma S8 and Proposition S12  
 855 then guarantee that

$$\frac{1}{n^2} \|U^*(V^*)^T - \widetilde{M}^*\|_F^2 \leq \tilde{C} \cdot (\mathcal{R}_n(UV^T) - \mathcal{R}_n(\widetilde{M}^*)) \quad (\text{S82})$$

856 for some constant  $\tilde{C}$  depending only on the quantities mentioned in the theorem statement. As  $\mathcal{X}$  is a  
 857 subset of  $\mathcal{B}_{2,\infty}(A_{2,\infty})$ , and  $(U^*, V^*)$  is a minimizer of  $\mathcal{L}(U, V)$ , we end up getting that

$$(\mathcal{R}_n(UV^T) - \mathcal{R}_n(\widetilde{M}^*)) \quad (\text{S83})$$

$$\leq \mathcal{R}_n(UV^T) - \mathcal{L}_n(U^*, V^*) + \mathcal{L}_n(M^*) - \mathcal{R}_n(\widetilde{M}^*) \quad (\text{S84})$$

$$\leq 2 \sup_{(U,V) \in X} |\mathcal{R}_n(U, V) - \mathcal{L}_n(U, V)| \quad (\text{S85})$$

858 from which we can apply Proposition S7 to then give the claimed result.  $\square$

859 We give some brief intuition as to the size of the constants involved here, to understand any potential  
 860 hidden dependencies involved in them. Of greatest concern are the constants  $A_{\infty}$  and  $A_{2,\infty}$  (as the  
 861 remaining constants are explicit throughout the proof, and depend only on the hyperparameters of the  
 862 sampling schema and the model in a polynomial fashion). Note that in the case where  $k$  is large and  
 863 we have a  $\text{SBM}(n, \kappa, \tilde{p}, \tilde{q}, \rho_n)$  model and we apply the DeepWalk scheme, from the discussion after  
 864 Lemma S9, the minimizing matrix  $M^*$  takes the form

$$(M^*)_{lm} \approx \log\left(\frac{\kappa \tilde{p}}{\tilde{p} + (\kappa - 1)\tilde{q}}\right) \delta_{lm} + \log\left(\frac{\kappa \tilde{q}}{\tilde{p} + (\kappa - 1)\tilde{q}}\right) (1 - \delta_{lm}). \quad (\text{S86})$$

865 Supposing for simplicity that  $\tilde{p} > \tilde{q}$ , it follows that we can take  $A_{\infty}$  to be of the order  
 866  $O(\log(\tilde{p}/\tilde{q}))$  when  $\kappa$  is large. In the rate from Proposition S12, this gives a rate of  $O(\tilde{p}/\tilde{q})$  from the  
 867  $e^{A_{\infty}}$  factor; note that the dependence on the parameters of the models here are not unreasonable. As  
 868 for  $A_{2,\infty}$ , we first highlight the fact that

$$(\kappa - 1) \log\left(\frac{\kappa \tilde{q}}{\tilde{p} + (\kappa - 1)\tilde{q}}\right) \rightarrow \frac{\tilde{p} - \tilde{q}}{\tilde{q}} \text{ as } \kappa \rightarrow \infty. \quad (\text{S87})$$

869 By Lemma S31 we can therefore take  $A_{2,\infty}$  to be a scalar multiple of  $|\log(\tilde{p}/\tilde{q})|^{1/2}$ , avoiding any  
 870 implicit dependence on  $\kappa$  or the embedding dimension  $d$ .



## 871 C.9 Convergence of the embedding vectors

872 We can then get results guaranteeing the convergence of the individual embedding vectors (rather  
873 than their gram matrix) up to rotations, as stated by the following theorem.

874 **Theorem S14.** *Suppose that the conclusion of Theorem S13 holds, and further suppose that  $d$  equals  
875 the rank of the matrix  $M^*$ . Then there exists a matrix  $\tilde{U}^* \in \mathbb{R}^{\kappa \times d}$  such that*

$$\min_{Q \in O(d)} \frac{1}{n} \sum_{i=1}^n \|u_i^* - \tilde{u}_{c(i)}^* Q\|_2^2 = C \cdot \begin{cases} O_p((\frac{\max\{\log n, d\}}{n\rho_n})^{1/2}) & \text{under Scenarios (i) and (iii);} \\ o_p(1) & \text{under Scenario (ii);} \end{cases} \quad (\text{S88})$$

876 *Proof.* We handle the cases where  $U \neq V$  and  $U = V$  separately. For the case where  $U \neq V$ , we  
877 note that without loss of generality we can suppose that  $UU^T = VV^T$ , in which case we can apply  
878 Lemma S23 and Theorem S13 to give the stated result. To do so, we note that by Lemma S25 we have  
879 that  $n^{-1}\sigma_d(\Pi M^* \Pi^T) \geq c\sigma_d(M^*)$  for some constant  $c$  with asymptotic probability 1, as a result  
880 of the fact that  $n_k(\Pi) \geq 1/2n\pi_k$  with asymptotic probability 1 uniformly across all communities  
881  $k \in [\kappa]$ . As moreover we have that  $n^{-1}\|UV^T - \Pi M^* \Pi^T\|_{\text{op}} \leq n^{-1}\|UV^T - \Pi M^* \Pi^T\|_F = o_p(1)$ ,  
882 the condition that  $\|UV^T - \Pi M^* \Pi^T\|_{\text{op}} \leq 1/2\sigma_d(\Pi M^* \Pi^T)$  holds with asymptotic probability 1,  
883 we have verified the conditions in Lemma S23, giving the desired result. In the case where we  
884 constrain  $U = V$ , the same argument holds, except we no longer need to verify the condition that  
885  $\|UU^* - M^*\|_{\text{op}}$  is sufficiently small, and so we have concluded in this case also.  $\square$

886 In the case of a  $\text{SBM}(n, \kappa, \tilde{p}, \tilde{q}, \rho_n)$  model it is actually able to give closed form expressions for the  
887 embedding vectors which are converged to by factorizing the minima matrix  $M^*$  in the way described  
888 by the above proof. These details are given in Lemma S31.

## 889 D Proof of Theorem 4 and Corollary 5

### 890 D.1 Guarantees for community detection

891 We begin with a discussion of how we can get guarantees for community detection via approximate  
892 k-means clustering method, using the convergence criteria for embeddings we have derived already.  
893 To do so, suppose we have a matrix  $U \in \mathbb{R}^{n \times d}$  corresponding of  $n$  columns of  $d$ -dimensional vectors.  
894 Defining the set

$$M_{n,K} := \{\Pi \in \{0, 1\}^{n \times K} : \text{each row of } \Pi \text{ has exactly } K - 1 \text{ zero entries}\}, \quad (\text{S89})$$

895 we seek to find a factorization  $U \approx \Pi X$  for matrices  $\Pi \in M_{n,K}$  and  $X \in \mathbb{R}^{K \times d}$ . To do so, we  
896 minimize the objective

$$\mathcal{L}_k(\Pi, X) = \frac{1}{n} \|U - \Pi X\|_F^2 \quad (\text{S90})$$

897 In practice, this minimization problem is NP-hard [5], but we can find  $(1 + \epsilon)$ -approximate solutions  
898 in polynomial time [24]. As a result, we consider any minimizers  $\hat{\Pi}$  and  $\hat{X}$  such that

$$\mathcal{L}_k(\hat{\Pi}, \hat{X}) \leq (1 + \epsilon) \min_{\Pi, X} \mathcal{L}_k(\Pi, X). \quad (\text{S91})$$

899 We want to examine the behavior of k-means clustering on the matrix  $U$ , when it is close to a matrix  
900  $U^*$  which has an exact factorization  $U^* = \Pi^* X^*$  for some matrices  $\Pi^* \in M_{n,K}$  and  $X^* \in \mathbb{R}^{K \times d}$ .  
901 We introduce the notation

$$G_k(\Pi) := \{i \in [n] : \Pi_{ik} = 1\}, \quad n_k(\Pi) := |G_k(\Pi)| \quad (\text{S92})$$

902 for the columns of  $U$  which are assigned as closest to the  $k$ -th column of  $X$  as according to the matrix  
903  $\Pi$ .

904 We make use of the following theorem from Lei and Rinaldo [29], which we restate for ease of use.

905 **Proposition S15** (Lemma 5.3 of Lei and Rinaldo [29]). *Let  $(\hat{\Pi}, \hat{X})$  be any  $(1 + \epsilon)$ -approximate  
906 minimizer to the k-means problem given a matrix  $U \in \mathbb{R}^{n \times d}$ . Suppose that  $U^* = \Pi^* X^*$  for some  
907 matrices  $\Pi^* \in M_{n,\kappa}$  and  $X^* \in \mathbb{R}^{\kappa \times d}$ . Fix any  $\delta_k \leq \min_{l \neq k} \|X_l^* - X_k^*\|_2$ , and suppose that the  
908 condition*

$$(16 + 8\epsilon) \|U - U^*\|_F^2 / \delta_k^2 < n_k(\Pi^*) \text{ for all } k \in [\kappa] \quad (\text{S93})$$

909 holds. Then there exist subsets  $S_k \subseteq G_k(\Pi^*)$  and a permutation matrix  $\sigma \in \mathbb{R}^{\kappa \times \kappa}$  such that the  
 910 following holds:

911 i) For  $G = \bigcup_k (G_k(\Pi^*) \setminus S_k)$ , we have that  $(\Pi^*)_{G..} = \sigma \Pi_{G..}$ . In words, outside of the sets  $S_k$   
 912 we recover the assignments given by  $\Pi^*$  up to a re-labelling of the clusters.

913 ii) The inequality  $\sum_{k=1}^{\kappa} |S_k| \delta_k^2 \leq (16 + 8\epsilon) \|U - U^*\|_F^2$  holds.

914 In particular, we can then apply this to our consistency results with the embeddings learned by  
 915 node2vec. Recall that we are interested in the following metrics measuring recovery of communities  
 916 by any given procedure:

$$L(c, \hat{c}) := \min_{\sigma \in \text{Sym}(\kappa)} \frac{1}{n} \sum_{i=1}^n 1[\hat{c}(i) \neq \sigma(c(i))], \quad (\text{S94})$$

$$\tilde{L}(c, \hat{c}) := \max_{k \in [\kappa]} \min_{\sigma \in \text{Sym}(\kappa)} \frac{1}{|\mathcal{C}_k|} \sum_{i \in \mathcal{C}_k} 1[\hat{c}(i) \neq \sigma(k)]. \quad (\text{S95})$$

917 These measure the overall misclassification rate and worst-case class misclassification rate respec-  
 918 tively.

919 **Corollary S16.** Suppose that we have embedding vectors  $\omega_i \in \mathbb{R}^d$  for  $i \in [n]$  such that

$$\min_{Q \in O(d)} \frac{1}{n} \sum_{i=1}^n \|\omega_i - \eta_{C(i)} Q\|_2^2 = O_p(r_n) \quad (\text{S96})$$

920 for some rate function  $r_n \rightarrow 0$  as  $n \rightarrow \infty$  and vectors  $\eta_l \in \mathbb{R}^d$  for  $l \in [\kappa]$ . Moreover suppose that  
 921  $\delta := \min_{l \neq k} \|\eta_l - \eta_k\|_2 > 0$ . Then if  $\hat{c}(i)$  are the community assignments produced by applying  
 922 a  $(1 + \epsilon)$ -approximate  $k$ -means clustering to the matrix whose columns are the  $\omega_i$ , we have that  
 923  $L(c, \hat{c}) = O_p(\delta^{-2} r_n)$  and  $\tilde{L}(c, \hat{c}) = O_p(\delta^{-2} r_n)$ . If the RHS of (S96) is instead  $o_p(1)$ , then we  
 924 replace  $O_p(r_n)$  by  $o_p(1)$  in the statements for  $L(c, \hat{c})$  and  $\tilde{L}(c, \hat{c})$ .

925 *Proof.* We apply Proposition S15 with  $\Pi^*$  corresponding to the matrix of community assignments  
 926 according to  $c(\cdot)$ , and  $X^*$  the matrix whose columns are the  $Q\eta_l$  for  $l \in [\kappa]$  where  $Q \in O(d)$  attains  
 927 the minimizer in (S96). Letting  $U$  be the matrix whose columns are the  $\omega_i$  and taking  $\delta_k = \delta$ , the  
 928 condition (S93) to verify becomes

$$\frac{16 + 8\epsilon}{\delta^2} \frac{1}{n} \sum_{i=1}^n \|\omega_i - Q\eta_{c(i)}\|_2^2 < \frac{|\mathcal{C}_k|}{n} \text{ for all } k \in [\kappa]. \quad (\text{S97})$$

929 As  $r_n \rightarrow 0$  and  $|\mathcal{C}_l|/n > c > 0$  for some constant  $c$  uniformly across vertices  $l \in [\kappa]$  with asymptotic  
 930 probability 1 (as a result of the community generation mechanism, the communities are balanced),  
 931 the above event will be satisfied with asymptotic probability 1. The desired conclusion follows by  
 932 making use of the inequalities

$$L(c, \hat{c}) \leq \frac{1}{n} \sum_{k \in [\kappa]} |S_k|, \quad \tilde{L}(c, \hat{c}) \leq \max_{k \in [\kappa]} \frac{1}{|\mathcal{C}_k|} |S_k| \leq \left( \max_{k \in [\kappa]} \frac{n}{|\mathcal{C}_k|} \right) \cdot \frac{1}{n} \sum_{l \in [\kappa]} |S_l| \quad (\text{S98})$$

933 which hold by the first consequence in Proposition S15, and then applying the bound

$$\frac{1}{n} \sum_{k \in [\kappa]} |S_k| \leq \frac{16 + 8\epsilon}{\delta^2} \cdot \frac{1}{n} \sum_{i=1}^n \|\omega_i - Q\eta_{c(i)}\|_2^2. \quad (\text{S99}) \quad \square$$

934 We note that in order to apply this theorem, we require the further separation criterion of  $\delta > 0$ .  
 935 As a result of Lemma S31, we can guarantee this for the  $\text{SBM}(n, \kappa, \tilde{p}, \tilde{q}, \rho_n)$  model when either a)  
 936 DeepWalk is trained in the unconstrained setting, or b) we are in the constrained setting with  $\tilde{p} > \tilde{q}$ .  
 937 As we know that the embedding vectors converge to the zero vector on average when we are in the  
 938 constrained setting with  $\tilde{p} \leq \tilde{q}$ , as a result we know that community detection is possible in the  
 939 constrained setting iff  $\tilde{p} > \tilde{q}$ , which gives Corollary 5 of the main paper.

## D.2 Guarantees for node classification and link prediction

We now discuss what guarantees we can make when using the embedding vectors for classification. In this section, we suppose that we have a guarantee

$$\frac{1}{n} \min_{Q \in O(d)} \sum_{i=1}^n \|u_i - \eta_{C(i)} Q\|_2^2 \leq C(\tau) r_n \quad \text{holds with probability } \geq 1 - \tau \quad (\text{S100})$$

for some constant  $C(\tau)$  and rate function  $r_n \rightarrow 0$  as  $n \rightarrow \infty$ . This is the same as saying that the LHS is  $O_p(r_n)$  - it will happen to be more convenient to use this formulation. We also suppose that there exists a positive constant  $\delta > 0$  for which

$$\delta \leq \min_{k \neq l} \|\eta_k - \eta_l\|_2. \quad (\text{S101})$$

We begin with a lemma which discusses the underlying geometry when we take a small sample of the embedding vectors.

**Lemma S17.** *Suppose we sample  $K$  embeddings from the set  $(u_i)_{i \in [n]}$ , which we denote as  $u_{i_1}, \dots, u_{i_K}$ . Define the sets*

$$S_l = \{i \in \mathcal{C}_l : \|u_i - \eta_{C(i)}\|_2 < \delta/4\}. \quad (\text{S102})$$

*Then there exists  $n_0(K, \delta, \tau')$  such that if  $n \geq n_0$ , with probability  $1 - \tau'$  we have that  $u_{i_j} \in S_{c(i_j)}$  for all  $j \in [K]$ .*

*Proof.* Without loss of generality, we will suppose that  $Q = I$ . For each  $l \in [\kappa]$ , define the sets  $S_l = \{i \in \mathcal{C}_l : \|u_i - \eta_l\|_2 \leq \delta/4\}$ . Then by the condition (S100), by Markov's inequality we know that with probability  $1 - \tau$  we have that

$$\frac{1}{n} \sum_{l \in [\kappa]} |\mathcal{C}_l \setminus S_l| \leq 4\delta^{-2} C(\tau/2) r_n. \quad (\text{S103})$$

We now suppose that we sample  $K$  embeddings uniformly at random; for convenience, we suppose that they are done so with replacement. Then the probability that all of the embeddings are outside the set  $\bigcup_l (\mathcal{C}_l \setminus S_l)$  is given by  $(1 - \frac{1}{n} \sum_l |\mathcal{C}_l \setminus S_l|)^K \geq 1 - \frac{K}{n} \sum_l |\mathcal{C}_l \setminus S_l|$ . In particular, this means with probability no less than  $1 - \tau - 4K\delta^{-1} C(\tau/2) r_n$ , if we sample  $K$  embeddings with indices  $i_1, \dots, i_K$  at random from the set of  $n$  embeddings, they lie within the sets  $S_{C(i_1)}, \dots, S_{C(i_K)}$  respectively. The desired result then follows by noting that we take  $\tau = \tau'/2$ , and choose  $n$  such that  $4\delta^{-2} C(\tau/2) r_n < \tau'/2$ .  $\square$

To understand how this lemma can give insights into the downstream use of embeddings, suppose that we have access to an oracle which provides the community assignments of a vertex when requested, but otherwise the community assignments are unseen.

We note that in practice, only a small number of labels are needed to be provided to embedding vectors in order to achieve good classification results (see e.g the experiments in Hamilton et al. [16], Veličković et al. [46]). As a result, we can imagine keeping  $K$  fixed in the regime where  $n$  is large. Moreover, the constant  $\delta$  simply reflects the underlying geometry of the learned embeddings, and  $\tau'$  is a tolerance we can choose such that the stated result is very likely to hold (by e.g choosing  $\tau' = 10^{-2}$  or  $10^{-3}$ ). As a consequence, the above lemma tells us with high probability, we can

- i) learn a classifier which is able to distinguish between the sets  $S_l$  given use of the sampled embeddings  $u_{i_1}, \dots, u_{i_K}$  and the labels  $c(i_1), \dots, c(i_K)$ , provided the classifier is flexible enough to separate  $\kappa$  disjoint convex sets; and
- ii) as a consequence of (S103), this classifier will correctly classify a large proportion of vertices within the correct sets  $S_l$ .

The same argument applies if instead we have classes assigned to embedding vectors which form a coarser partitioning of the underlying community assignments. The importance of the above result is that in order to understand the behavior of embedding methods for classification, it suffices to understand which geometries particular classifiers are able to separate - for example, when the number

of classes equals 2, this reduces down to the classic concept of linear separability, in which case a logistic classifier would suffice.

We end with a discussion as to the task of link prediction, which asks to predict whether two vertices are connected or not given a partial observation of the network. To do so, we suppose that from the observed network, we delete half of the edges in the network, and then train node2vec on the resulting network. Note that the node2vec mechanism only makes explicit use of known edges within the network. This corresponds to training the node2vec model on the data with sparsity factor  $\rho_n \rightarrow \rho_n/2$ ; in particular, this leaves the underlying asymptotic representations unchanged and slows the rate of convergence by a factor of 2. With this, a link prediction classifier is formed by the following process:

1. Take a set of edges  $J \subseteq \{(i, j) : a_{ij} = 1\}$  for which the node2vec algorithm was not trained on, and a set of non-edges  $\tilde{J} \subseteq \{(i, j) : a_{ij} = 0\}$ . As in practice networks are sparse, these sets are not sampled randomly from the network, but are assumed to be sampled in a balanced fashion so that the sets  $J$  and  $\tilde{J}$  are roughly balanced in size. One way of doing so is to pick a number of edges in advance, say  $E$ , and then sample  $E$  elements from the set of edges and non-edges in order to form  $J$  and  $\tilde{J}$  respectively.
2. Form edge embeddings  $e_{ij} = f(u_i, u_j)$  given some symmetric function  $f(x, y)$  and node embeddings  $u_i$ . Two popular choices of functions are the average function  $f(x, y) = (x + y)/2$  and the Hadamard product  $f(x, y) = (x_i y_i)_{i \in [d]}$ .
3. Using the features  $e_{ij}$  and the labels provided by the sets  $J$  and  $\tilde{J}$ , build a classifier using your favorite ML algorithm.

By our convergence guarantees, we know that the asymptotic distribution of the edge embeddings  $e_{ij}$  will approach some vectors  $\eta_{c(i), c(j)} \in \mathbb{R}^d$ , giving at most  $\kappa^2$  distinct vectors overall. Note that these embedding vectors in of themselves contain little information about whether the edges are connected; that said, even given perfect information of the communities and the connectivity matrix  $P$ , one can only form probabilistic guesses as to whether two vertices are connected. That said, by clustering together the link embeddings we can identify together edges as having vertices belonging to a particular pair of communities. With knowledge of the sampling mechanism, it is then possible to backout estimates for  $p$  and  $q$  by counting the overlap of the sets  $J$  and  $\tilde{J}$  in the neighbourhoods of the clustered node embeddings.

We note that in practice, ML classification algorithms such as logistic regression are used instead. This instead depends on the typical geometry of the sets  $J$  and  $\tilde{J}$ . Suppose we have a  $\text{SBM}(n, 2, \tilde{p}, \tilde{q}, \rho_n)$  model. In this case, the set  $J$  will approximately consist of  $\tilde{p}/2(\tilde{p} + \tilde{q}) \times E$  vectors from  $\eta_{11}$ ,  $\tilde{p}/2(\tilde{p} + \tilde{q}) \times E$  vectors from  $\eta_{22}$ ,  $\tilde{q}/2(\tilde{p} + \tilde{q}) \times E$  vectors from  $\eta_{12}$  and  $\tilde{q}/2(\tilde{p} + \tilde{q}) \times E$  vectors from  $\eta_{21}$ . In contrast, the set  $\tilde{J}$  will approximately have  $E/4$  of each of  $\eta_{11}$ ,  $\eta_{12}$ ,  $\eta_{21}$  and  $\eta_{22}$ . As a result, in the case where  $\tilde{p} \gg \tilde{q}$ , a linear classifier (for example) will be biased towards classifying more frequently vectors with  $c(i) = c(j)$ , which is at least directionally correct.

So far, we have not talked about the particular mechanism used to form link embeddings from the node embeddings. The Hadamard product is popular, but particularly difficult to analyze given our results, as it does not remain invariant to an orthogonal rotation of the embedding vectors. In contrast, the average link function retains this information. In the  $\text{SBM}(n, 2, \tilde{p}, \tilde{q}, \rho_n)$ , it ends up giving embeddings which will asymptotically depend on only whether  $c(i) = c(j)$  or not (i.e, whether the vertices belong to the same community or not).

## E Intermediate results

### E.1 Sampling probabilities for node2vec

In this section, we derive asymptotic results for the sampling probabilities of edges within node2vec. We begin by recapping the second-order random walk defined for node2vec. To do so, we define a

1027 random process  $(X_n)_{n \geq 1}$  via the second-order Markov property

$$\mathbb{P}(X_n = u \mid X_{n-1} = s, X_{n-2} = v) \propto \begin{cases} 0 & \text{if } (u, s) \notin \mathcal{E}, \\ 1/p & \text{if } d_{u,v} = 0 \text{ and } (u, s) \in \mathcal{E}, \\ 1 & \text{if } d_{u,v} = 1 \text{ and } (u, s) \in \mathcal{E}, \\ 1/q & \text{if } d_{u,v} = 2 \text{ and } (u, s) \in \mathcal{E}. \end{cases} \quad (\text{S104})$$

1028 where  $d_{u,s}$  denotes the length of the shortest path between  $u$  and  $s$ . Given the extra information  
 1029 that  $(u, s)$  is an edge,  $d_{u,v} = 0$  occurs iff  $u = v$ ,  $d_{u,v} = 1$  occurs iff  $(u, v)$  is an edge, and  $d_{u,v} = 2$   
 1030 occurs iff  $(u, v)$  is not an edge (as given that  $(v, s)$  is an edge, the shortest path must be  $v \rightarrow s \rightarrow u$ ).  
 1031 With this, we select positive samples by selecting  $k$  concurrent edges within the walk (via taking a  
 1032 walk of length  $k + 1$ ).

1033 To initialize the random walk, we note that for the second order walk we need to specify a distribution  
 1034 on the first two vertices; for DeepWalk where this collapses down to a first order walk, we only need  
 1035 to specify a distribution on their first vertex. To do so generally, we consider an initial distribution of  
 1036 selecting the first vertex via  $\pi(u) = \deg(u) / \sum_v \deg(v) = \deg(u) / 2E_n$  with  $E_n$  being the number  
 1037 of edges in the graph (single counting  $(u, v) \in \mathcal{E}$  and  $(v, u) \in \mathcal{E}$ ), and select the second vertex  
 1038 uniformly at random from those connected to the first. (Note that this is the transition kernel used  
 1039 for DeepWalk, and so we handle both cases via this argument.) One can show this is equivalent to  
 1040 selecting an edge uniformly at random.

1041 For the negative sampling mechanism, we consider the vertices which arose as part of the positive  
 1042 sampling process - which we denote  $V(\mathcal{P})$  - and then sample  $l$  vertices independently according to  
 1043 the unigram distribution

$$\text{Ug}_\alpha(v \mid u, \mathcal{G}_n) = \frac{\deg(v)^\alpha}{\sum_{v' \neq u} \deg(v')^\alpha} \quad (\text{S105})$$

1044 where  $u \in V(\mathcal{P})$ . We note that the case where  $\alpha \rightarrow 0$  corresponds to the uniform distribution on  
 1045 vertices not equal to  $u$ .

### 1046 E.1.1 Proof of Theorem S1

1047 In this section and the next, it will be convenient to use the notation  $\sim_p$  to indicate that two  
 1048 positive random variables  $X_n$  and  $Y_n$  are asymptotic in the sense that  $|X_n/Y_n - 1| = o_p(1)$  when  
 1049  $n \rightarrow \infty$ . If we say such a bound happens uniformly over some free variables - say  $X_{n,k} \sim_p Y_{n,k}$   
 1050 uniformly over  $k$  - then this means  $\max_k |X_{n,k}/Y_{n,k} - 1| = o_p(1)$ . We also make extensive  
 1051 use of the result that if  $X_n^{(i)} \sim_p r_n Y_n^{(i)}$  for  $i \in \{0, 1\}$  and  $Y_n^{(i)} \in [C^{-1}, C]$  for  $C > 1$ , then  
 1052  $X_n^{(0)} + X_n^{(1)} \sim_p r_n (Y_n^{(0)} + Y_n^{(1)})$ . Indeed, if we write  $X_n^{(i)} = Y_n^{(i)} r_n (1 + \epsilon_n^{(i)})$  where  $\epsilon_n^{(1)} = o_p(1)$ ,  
 1053 then

$$X_n^{(0)} + X_n^{(1)} = r_n (Y_n^{(0)} + Y_n^{(1)}) \cdot \left( 1 + \frac{Y_n^{(0)}}{Y_n^{(0)} + Y_n^{(1)}} \epsilon_n^{(0)} + \frac{Y_n^{(1)}}{Y_n^{(0)} + Y_n^{(1)}} \epsilon_n^{(1)} \right) \quad (\text{S106})$$

1054 from which the claimed result follows as the terms weighting the  $\epsilon_n^{(1)}$  can be bounded below away  
 1055 from zero, and are bounded above by 1. We also note that  $X_n^{(0)} - X_n^{(1)} = O_p(r_n)$ , meaning that the  
 1056 order of magnitude of terms cannot increase (only decrease) by subtracting them.

1057 As we are interested in the sampling probability of edges within node2vec, it will be convenient  
 1058 to instead study the first order Markov process  $Y_n = (X_n, X_{n-1})$ , as then we instead study the  
 1059 sampling probability of individual states in a regular Markov chain. We note that normally we use  
 1060 the notation  $(u, v)$  to refer an unordered pair belonging to an edge in a graph, but for the Markov  
 1061 process  $(Y_n)_{n \geq 1}$  the order matters, we will write  $Y_n = e_{v \rightarrow u}$  whenever  $X_n = u$  and  $X_{n-1} = v$ . In  
 1062 such a scenario, the random walk is therefore defined on the state space

$$S = \bigcup_{(u,v) \in \mathcal{E}} \{e_{u \rightarrow v}, e_{v \rightarrow u}\}.$$

1063 with the law of  $Y$  given by

$$\mathbb{P}(Y_n = e_{t \rightarrow u} \mid Y_{n-1} = e_{v \rightarrow s}) = 0 \text{ if } t \neq s, \quad (\text{S107})$$

$$\mathbb{P}(Y_n = e_{s \rightarrow u} \mid Y_{n-1} = e_{v \rightarrow s}) \propto \begin{cases} 0 & \text{if } (s, u) \notin \mathcal{E} \\ \frac{1[u=v]}{p} + 1[u \neq v](a_{uv} + \frac{1-a_{uv}}{q}) & \text{otherwise.} \end{cases} \quad (\text{S108})$$

1064 One can calculate the normalizing factor for the probability distribution as being

$$\left(\frac{1}{p} - \frac{1}{q}\right) + \frac{1}{q} \deg(s) + \left(1 - \frac{1}{q}\right) \sum_{u \in \mathcal{V} \setminus \{v\}} a_{su} a_{uv}, \quad (\text{S109})$$

1065 from which we observe that when  $p = q = 1$  we recover the simple random walk defined by  
 1066 DeepWalk, as then the probability an edge is selected with source node  $u$  is uniform over edges  $(u, v)$   
 1067 where  $v$  is a neighbour of  $u$ .

1068 With this in mind, we define the transition matrix

$$P_{v \rightarrow s, s \rightarrow u} = \frac{a_{su} \cdot \{1[u = v] \cdot 1/p + 1[u \neq v](a_{uv} + 1/q \cdot (1 - a_{uv}))\}}{\left(\frac{1}{p} - \frac{1}{q}\right) + \frac{1}{q} \deg(s) + \left(1 - \frac{1}{q}\right) \sum_{u \in \mathcal{V} \setminus \{v\}} a_{su} a_{uv}} \quad (\text{S110})$$

1069 governing the transition probabilities on the above chain. We note that by [11, Proposition 72] and  
 1070 Theorem S26 respectively that

$$\deg(s) \sim_p n \rho_n W(\lambda_s, \cdot), \quad (\text{S111})$$

$$\sum_{u \in \mathcal{V} \setminus \{v\}} a_{su} a_{uv} \sim_p n \rho_n^2 T(\lambda_s, \lambda_v) \text{ where } T(\lambda_s, \lambda_v) := \mathbb{E}_{\lambda \sim \text{Unif}[0,1]} [W(\lambda_u, \lambda) W(\lambda, \lambda_v) \mid \lambda_u, \lambda_v] \quad (\text{S112})$$

1071 uniformly over all  $s, u, v$ . As a result, we define

$$\tilde{P}_{v \rightarrow s, s \rightarrow u} = \frac{a_{su} \cdot \{q^{-1} + (1 - q^{-1})a_{vu} + \delta_{uv}(p^{-1} - q^{-1})\}}{\left(\frac{1}{p} - \frac{1}{q}\right) + \frac{1}{q} n \rho_n W(\lambda_s, \cdot) + \left(1 - \frac{1}{q}\right) n \rho_n^2 T(\lambda_s, \lambda_v)}. \quad (\text{S113})$$

1072 where  $\delta_{uv} := 1[u = v]$  and the numerator is the same as in  $P_{v \rightarrow s, s \rightarrow u}$  (only written in a more  
 1073 convenient to use fashion), and the denominator makes use of the asymptotic statements (S111) and  
 1074 (S112). As a result, we have that  $P_{v \rightarrow s, s \rightarrow u} \sim_p \tilde{P}_{v \rightarrow s, s \rightarrow u}$  uniformly over  $v, s, u$ . In particular, we  
 1075 have that  $\tilde{P}_{v \rightarrow s, s \rightarrow u} = \Theta_p(a_{su}(n \rho_n)^{-1})$  uniformly over all triples of indices  $(v, s, u)$ .

1076 Let  $A_j(u \rightarrow v) = \{Y_j = e_{u \rightarrow v}\}$ . We then note that the sampling probability of  $(u, v)$  being sampled  
 1077 within the first  $k + 1$  steps of the second order random walk is given by

$$\mathbb{P}\left(\bigcup_{j \leq k} A_j(u \rightarrow v) \cup A_j(v \rightarrow u) \mid \mathcal{G}_n\right). \quad (\text{S114})$$

1078 To ease on the notation going forward, we write  $\mathbb{P}_n(\cdot) := \mathbb{P}(\cdot \mid \mathcal{G}_n)$ . By the inclusion-exclusion  
 1079 principle, we can write this probability as equalling

$$\sum_{\substack{l, m \geq 1 \\ l+m \leq k}} (-1)^{k+m+1} \sum_{\substack{1 \leq i_1 < i_2 < \dots < i_l \leq k \\ 1 \leq j_1 < j_2 < \dots < j_m \leq m}} \mathbb{P}_n\left(\bigcap_{k \leq l} A_{i_k}(u \rightarrow v) \cap \bigcap_{k \leq m} A_{j_k}(v \rightarrow u)\right). \quad (\text{S115})$$

1080 We note that the number of terms in this sum is bounded above by  $(2k)!$  (some terms will be zero,  
 1081 as we cannot select  $e_{u \rightarrow v}$  two times in a row), and so for asymptotic purposes we can focus on the  
 1082 individual terms.

1083 We now address the individual probabilities making up this sum. Intuitively, we want to show the  
 1084 following: that the terms for which  $(l, m) \neq (1, 0)$  or  $(0, 1)$  are asymptotically negligible, and that  
 1085 asymptotically these terms are functions only of  $(\lambda_u, \lambda_v)$ . We fix a particular instance of the  $i_1, \dots, i_l$   
 1086 and  $j_1, \dots, j_m$ , and denote  $\beta_1 < \beta_2 < \dots < \beta_{l+m}$  for the ordering of these indices. As we use  
 1087 indices  $i_k$  to denote the direction  $u \rightarrow v$  and  $j_k$  for the direction  $v \rightarrow u$ , we write

$$A_i(u \rightarrow v) =: A_\beta(u, v, 0), \quad A_j(v \rightarrow u) =: A_\beta(u, v, 1) \quad (\text{S116})$$

1088 where the third argument (which we refer to as the orientation herein) indicates which of the first  
 1089 two arguments are used as the source node for the edge. For each  $\beta_k$  for  $k \leq l + m$ , we write  $o_k$  to  
 1090 denote this orientation. As a result, it suffices for us to analyze

$$\mathbb{P}_n\left(\bigcap_{k \leq l+m} A_{\beta_k}(u, v, o_k)\right) \quad (\text{S117})$$

over all sequences  $1 \leq \beta_1 < \beta_2 < \dots < \beta_{l+m} \leq k$  and orientations  $(o_k)_{k=1}^{l+m}$ . For this, we then note that by the Markov property of the random walk, we are able to write this probability as

$$\left[ \prod_{k \leq l+m-1} \mathbb{P}_n \left( A_{\beta_{k+1}}(u, v, o_{k+1}) \mid A_{\beta_k}(u, v, o_k) \right) \right] \cdot \mathbb{P}_n(A_{\beta_1}(u, v, o_1)) \quad (\text{S118})$$

$$= \left[ \prod_{k \leq l+m-1} \mathbb{P}_n \left( A_{\beta_{k+1}-\beta_k+1}(u, v, o_{k+1}) \mid A_1(u, v, o_k) \right) \right] \cdot \mathbb{P}_n(A_{\beta_1}(u, v, o_1)) \quad (\text{S119})$$

Focusing now on the terms in the product, if  $\beta_{k+1} - \beta_k = 1$ , then this term equals zero if  $o_k = o_{k+1}$ , or otherwise equals e.g.  $P_{u \rightarrow v, v \rightarrow u}$  which is  $O_p((n\rho_n)^{-1})$  as discussed above. If the walk is longer, then by the same argument as in [11, Proposition 73], by conditioning on the second step in the walk one can show this probability is asymptotically of the same order of a walk of length  $\beta_{k+1} - \beta_k - 1$  initialized from the uniform distribution on the edges of  $\mathcal{G}_n$ . As a result, we therefore only need to analyze events of the form

$$\mathbb{P}_n(A_\beta(u, v, o)) \quad (\text{S120})$$

which will allow us to then show that the events of the form  $(l, m) = (1, 0)$  or  $(0, 1)$  are the only ones we need to consider in the asymptotic expansion. Going forward, we assume that  $o = 0$ , as the sum (S115) is symmetric in the orientation  $o$  and the arguments are unchanged.

To do so, we begin by writing  $\pi' = (a_{uv}/|\mathcal{E}|)_{u,v}$  for the initial distribution provided to  $Y_1$ . To analyze  $p_n(u, v, \beta) := \mathbb{P}_n(A_\beta(u, v, 0))$ , note that when  $\beta = 1$  we trivially have that this probability equals  $a_{uv}/|\mathcal{E}|$  and we know that  $|\mathcal{E}| \sim_p n^2 \rho_n \mathcal{E}_W(1)$ . In the case where  $\beta \geq 2$ , we consider the set of sequences  $\alpha = (\alpha_0, \dots, \alpha_{\beta-2}) \in \mathcal{V}^{\beta-1}$ , where we then have that

$$p_n(u, v, 2) = \frac{1}{|\mathcal{E}|} \sum_{\alpha_0} a_{\alpha_0, u} P_{\alpha_0 \rightarrow u, u \rightarrow v} \quad (\text{S121})$$

$$p_n(u, v, \beta) = \frac{1}{|\mathcal{E}|} \sum_{\alpha} a_{\alpha_0, \alpha_1} \cdot \prod_{j=1}^{\beta} P_{\alpha_{j-1} \rightarrow \alpha_j, \alpha_j \rightarrow \alpha_{j+1}} \cdot P_{\alpha_{\beta-2} \rightarrow \alpha_{\beta-1}, \alpha_{\beta-1} \rightarrow u} P_{\alpha_{\beta-1} \rightarrow u, u \rightarrow v} \quad (\text{S122})$$

for  $\beta \geq 3$ .

To study these sums, we begin by noting that they are asymptotic to their versions where we replace  $P \rightarrow \tilde{P}$ . Indeed, we note that if we have positive sequences  $(a_i)$  and  $(b_i)$ , then

$$\left| \frac{\sum_j a_j}{\sum_j b_j} - 1 \right| = \frac{|\sum_j b_j (a_j/b_j - 1)|}{\sum_j b_j} \leq \max_j \left| \frac{a_j}{b_j} - 1 \right|, \quad (\text{S123})$$

and so the fact that we know  $P \sim_p \tilde{P}$  uniformly, means that we can apply this to obtain asymptotic formulae for their sums also. With this, if we write  $N(\lambda_s, \lambda_t)$  for the denominator of  $\tilde{P}_{t \rightarrow s, s \rightarrow u}$ ,  $p_n(u, v, \beta)$  can be asymptotically be decomposed into a linear combination of terms (bounded in number by a function of  $k$  independent of  $n$ ) of the form

$$\frac{c(p, q) a_{uv}}{|\mathcal{E}|} \sum_{\alpha \in \mathcal{V}^{\beta-1}} \left\{ \left( \prod_{2 \leq i \leq \beta} N(\lambda_{\tilde{\alpha}_{i-1}}, \lambda_{\tilde{\alpha}_i}) \right)^{-1} \cdot \prod_{i \leq \beta-1} a_{\tilde{\alpha}_{i-1}, \tilde{\alpha}_i} \cdot \prod_{j \in J} a_{\tilde{\alpha}_{j-1}, \tilde{\alpha}_{j+1}} \cdot \prod_{k \in K} \delta_{\tilde{\alpha}_{k-1}, \tilde{\alpha}_{k+1}} \right\} \quad (\text{S124})$$

where:

- we write  $\tilde{\alpha}$  for the concatenation  $(\alpha, u, v)$ , meaning  $\tilde{\alpha}$  is of length  $\beta + 1$ , with  $\tilde{\alpha}_k = \alpha_k$  for  $k \leq \beta - 1$ ,  $\tilde{\alpha}_\beta = u$  and  $\tilde{\alpha}_{\beta+1} = v$ ;
- $c(p, q) = (q^{-1})^{\beta-|J|-|K|} (1 - q^{-1})^{|J|} (p^{-1} - q^{-1})^{|K|}$  is a polynomial in  $p^{-1}$  and  $q^{-1}$ ;
- $J$  and  $K$  are possibly empty subsets of  $\{1, \dots, \beta\}$  which are disjoint.

1118 The more tedious part to handle is when the set  $K$  is non-empty; as each delta function acts to  
 1119 contract the sum along one variable, doing so allows us to rewrite (S124) as

$$\frac{a_{uv}}{|\mathcal{E}|} c(p, q) \sum_{\alpha \in \mathcal{V}^{\beta-1-|K|}} \left\{ \left( \prod_{2 \leq i \leq \beta-|K|} N(\lambda_{\tilde{\alpha}_{i-1}}, \lambda_{\tilde{\alpha}_i})^{n_i} \right)^{-1} \cdot \prod_{i \leq \beta-1-|K|} a_{\tilde{\alpha}_{i-1}, \tilde{\alpha}_i} \cdot \prod_{j \in \tilde{J}} a_{\tilde{\alpha}_{j-1}, \tilde{\alpha}_{j+1}} \right\} \quad (\text{S125})$$

1120 after a) performing some relabeling of the indices and modification to the set  $J$ , to give a new set  
 1121  $\tilde{J}$  which is a subset of  $\{1, \dots, \beta - |K|\}$  and b) introducing some multiplicities  $n_i$  which sum to  
 1122  $\beta - 1$ . By Theorem S26 we uniformly have that this quantity is asymptotic, uniformly over all the  
 1123 free variables in the expression, to

$$\frac{\rho_n^{|\tilde{J}|}}{(n\rho_n)^{|K|}} \cdot \frac{a_{uv} c(p, q) \rho_n^{-1}}{n^2 \mathcal{E}_W(1)} \cdot \mathbb{E} \left[ \frac{\prod_{i \leq \beta-1-|K|} W(\lambda'_{i-1}, \lambda'_i) \prod_{j \in \tilde{J}} W(\lambda'_{j-1}, \lambda'_{j+1})}{\prod_{2 \leq i \leq \beta-|K|} N'(\lambda'_{i-1}, \lambda'_i)^{n_i}} \mid \lambda_u, \lambda_v \right] \quad (\text{S126})$$

1124 where we write  $\lambda' = (\tilde{\lambda}_0, \dots, \tilde{\lambda}_{\beta-2-|K|}, \lambda_u, \lambda_v)$  and  $\tilde{\lambda}$  is an independent copy of  $\lambda$ , and  
 1125  $N'(\lambda_u, \lambda_v) := (n\rho_n)^{-1} N(\lambda_u, \lambda_v)$ . As  $n\rho_n \rightarrow \infty$  under the prescribed conditions, we only need to  
 1126 consider leading terms of the order  $\rho_n^{-1} n^2$ , which shows that the sampling probability is asymptotic  
 1127 (uniformly over all vertices) to  $\rho_n^{-1} n^2$  for some function  $g_{\mathcal{P}}(\lambda_u, \lambda_v)$ . To argue that this function is  
 1128 bounded above away from zero, we note that the terms where  $|J| + |K| > 0$  will be asymptotically  
 1129 negligible, and the remainder of the terms give a positive weighted sum.

### 1130 E.1.2 Proof of Theorem S2

1131 To understand the selection probability for the vertex pair  $(u, v)$  to be selected via negative sampling,  
 1132 define the events

$$A_i(u) = \{X_i = u\}, \quad B_i(v|u) = \{v \text{ selected via negative sampling from } u\} \quad (\text{S127})$$

1133 so then

$$\mathbb{P}((u, v) \in \mathcal{N}(\mathcal{G}_n) \mid \mathcal{G}_n) = \mathbb{P}\left(\bigcup_{i=0}^k (A_i(u) \cap B_i(v|u)) \cup (A_i(v) \cap B_i(u|v)) \mid \mathcal{G}_n\right). \quad (\text{S128})$$

1134 We note that

$$\mathbb{P}(A_i(u) \cap B_i(v|u) \mid \mathcal{G}_n) = \mathbb{P}(A_i(u) \mid \mathcal{G}_n) \cdot \mathbb{P}(\text{Binomial}(l, \text{Ug}_\alpha(v|u)) \geq 1 \mid \mathcal{G}_n). \quad (\text{S129})$$

1135 As a result, we need to begin by understanding the asymptotic probabilities of  $\mathbb{P}(A_i(v) \mid \mathcal{G}_n)$  and the  
 1136 unigram sampling probability. We begin with understanding the first probability. If  $i \in \{0, 1\}$ , then we  
 1137 have that  $\mathbb{P}(A_i(v) \mid \mathcal{G}_n) = \deg(v)/2E_n \sim_p W(\lambda_v, \cdot)/n\mathcal{E}_W(1)$  uniformly in  $v$  [11, Proposition 72].  
 1138 For  $i \geq 2$ , we have that

$$\mathbb{P}(A_i(v) \mid \mathcal{G}_n) = \sum_u \mathbb{P}(A_i(u \rightarrow v) \mid \mathcal{G}_n) \quad (\text{S130})$$

1139 using the same notation as in Appendix E.1.1. Consequently, via the same arguments as in Ap-  
 1140 pendix E.1.1, it will be asymptotic to a positive linear combination of statistics of the form

$$\frac{c(p, q)}{|\mathcal{E}|} \sum_{\alpha \in \mathcal{V}^\beta} \left\{ \left( \prod_{2 \leq i \leq \beta-|K|} N(\lambda_{\tilde{\alpha}_{i-1}}, \lambda_{\tilde{\alpha}_i})^{n_i} \right)^{-1} \cdot \prod_{i \leq \beta-|K|} a_{\tilde{\alpha}_{i-1}, \tilde{\alpha}_i} \cdot \prod_{j \in \tilde{J}} a_{\tilde{\alpha}_{j-1}, \tilde{\alpha}_{j+1}} \right\} \quad (\text{S131})$$

1141 where we write  $\tilde{\alpha} = (\alpha, v)$  for  $\alpha \in \mathcal{V}^\beta$ . Using the same relabeling and arguments as given in  
 1142 Appendix E.1.1 will be asymptotic to

$$\frac{\rho_n^{|\tilde{J}|}}{(n\rho_n)^{|K|}} \cdot \frac{c(p, q)}{n\mathcal{E}_W(1)} \cdot \mathbb{E} \left[ \frac{\prod_{i \leq \beta-|K|} W(\lambda'_{i-1}, \lambda'_i) \prod_{j \in \tilde{J}} W(\lambda'_{j-1}, \lambda'_{j+1})}{\prod_{2 \leq i \leq \beta-|K|} N'(\lambda'_{i-1}, \lambda'_i)^{n_i}} \mid \lambda_v \right] \quad (\text{S132})$$

1143 uniformly in all the free variables involved, where  $\lambda' = (\tilde{\lambda}_0, \dots, \tilde{\lambda}_{\beta-1-|K|}, \lambda_v)$  and  $\tilde{\lambda}$  is an indepen-  
 1144 dent copy of  $\lambda$ . (We note that while Theorem S26 is expressed in terms of concentration of quantities  
 1145 around functions which depend on both  $\lambda_u$  and  $\lambda_v$ , the exact same reasoning will apply for statistics  
 1146 which only end up depending on  $\lambda_v$ .) In particular by taking the highest order terms of this expansion,



1147 we have that there exists some measurable function  $g_i(\cdot)$  which is bounded below and above, for each  
 1148  $i$ , such that  $\mathbb{P}(A_i(u) \mid \mathcal{G}_n) \sim_p n^{-1} g_i(\lambda_u)$  uniformly in  $u$ .

1149 As for the unigram sampling term, we note that by [11, Proposition 77] we have that

$$\mathbb{P}(\text{Binomial}(l, \text{Ug}_\alpha(v|u)) \sim_p \frac{lW(\lambda_u, \cdot)^\alpha}{n\mathcal{E}_W(\alpha)} \quad (\text{S133})$$

1150 uniformly in the vertices  $v, u$ . With this, we note that the same arguments via self-intersection allow  
 1151 us to argue that

$$\mathbb{P}((u, v) \in \mathcal{N}(\mathcal{G}_n) \mid \mathcal{G}_n) \sim_p \frac{l}{n^2} \sum_{i=0}^k \frac{l}{\mathcal{E}_W(\alpha)} (g_i(\lambda_u)W(\lambda_v, \cdot)^\alpha + g_i(\lambda_v)W(\lambda_u, \cdot)^\alpha) \quad (\text{S134})$$

1152 which gives the claimed result.

## 1153 E.2 Chaining and bounds on Talagrand functionals

1154 In this section, let  $L > 0$  denote a universal constant (which may differ across occurrences) and  $K(\alpha)$   
 1155 a universal constant which depends on a variable  $\alpha$  (but for fixed  $\alpha$  also differs across occurrences).  
 1156 For a metric space  $(T, d)$ , we define the *diameter* of  $T$  as

$$\Delta(T) := \sup_{t_1, t_2 \in T} d(t_1, t_2). \quad (\text{S135})$$

1157 We also define the entropy and covering numbers respectively by

$$N(T, d, \epsilon) := \min \{n \in \mathbb{N} \mid F \subseteq T, |F| \leq n, d(t, F) \leq \epsilon \text{ for all } t \in T\}, \quad (\text{S136})$$

$$e_n(T) := \inf \left\{ \sup_{t \in T} d(t, T_n) \mid T_n \subseteq T, |T_n| \leq 2^{2^n} \right\} = \inf \{ \epsilon > 0 \mid N(t, d, \epsilon) \leq 2^{2^n} \}. \quad (\text{S137})$$

1158 We then define the *Talagrand  $\gamma_\alpha$  functional* [42] of the metric space  $(T, d)$  by

$$\gamma_\alpha(T, d) = \inf \sup_{t \in T} \sum_{n \geq 0} 2^{n/\alpha} \Delta(A_n(t)) \quad (\text{S138})$$

1159 where the infimum is taking over all *admissible sequences*; these are increasing sequences  $(\mathcal{A}_n)_{n \geq 0}$   
 1160 of  $T$  such that  $|\mathcal{A}_0| = 1$  and  $|\mathcal{A}_n| \leq 2^{2^n}$  for all  $n$ , with  $A_n(t)$  being the unique element of  $\mathcal{A}_n$  which  
 1161 contains  $t$ . We will shortly see that this quantity helps to control the supremum of empirical processes  
 1162 on the metric space  $(T, d)$ . We first give some generic properties for the above functional.

1163 **Lemma S18.** *a) Suppose that  $d$  is a metric on  $T$ , and  $M > 0$  is a constant. Then*  
 1164  $\gamma_\alpha(T, Md) = M\gamma_\alpha(T, d)$ . *If  $U \subseteq T$ , then  $\gamma_\alpha(U, d) \leq \gamma_\alpha(T, d)$ .*

1165 *b) Suppose that  $(T_1, d_1)$  and  $(T_2, d_2)$  are metric spaces, so  $d = d_1 + d_2$  is a metric on the*  
 1166 *product space  $T = T_1 \times T_2$ . Then  $\gamma_\alpha(T, d) \leq K(\alpha)(\gamma_\alpha(T_1, d_1) + \gamma_\alpha(T_2, d_2))$ .*

1167 *c) We have the upper bounds*

$$\gamma_\alpha(T, d) \leq K(\alpha) \sum_{n \geq 0} 2^{n/\alpha} e_n(T) \leq K(\alpha) \int_0^\infty (\log N(T, d, \epsilon))^{1/\alpha} d\epsilon. \quad (\text{S139})$$

1168 *d) Suppose that  $\|\cdot\|$  is a norm on  $\mathbb{R}^m$ ,  $d$  is the metric induced by  $\|\cdot\|$ , and  $B_A = \{x :$   
 1169  $\|x\| \leq A\}$ . *Then one has the bound  $N(B_A, d, \epsilon) \leq \max\{(3A/\epsilon)^m, 1\}$ , and consequently*  
 1170  $\gamma_\alpha(B_A, d) \leq K(\alpha)Am^{1/\alpha}$ .*

1171 *Proof.* The first statement in a) is immediate, and the second part is Theorem 2.7.5 a) of Talagrand  
 1172 [42].

1173 For part b), suppose that  $\mathcal{A}_n^i$  are admissible sequences for  $(T_i, d_i)$  such that

$$\sup_{t_i \in T_i} \sum_{n \geq 0} 2^{n/\alpha} \Delta(A_n^i(t)) \leq 2\gamma_\alpha(T_i, d_i) \text{ for } i = 1, 2. \quad (\text{S140})$$

1174 If we then form the sequence of sets  $\mathcal{B}_n := \{A_1 \times A_2 : A_i \in \mathcal{A}_{n-1}^i\}$  for  $n \geq 1$  and  $\mathcal{B}_0 = T_1 \times T_2$ ,  
 1175 we have that  $\mathcal{B}_n$  is a partition of  $T$  for each  $n$ ,  $|\mathcal{B}_0| = 1$  and  $|\mathcal{B}_n| = |\mathcal{A}_{n-1}^1| \cdot |\mathcal{A}_{n-1}^2| \leq 2^{2^n}$  for each  
 1176  $n$ , meaning that  $\mathcal{B}_n$  is an admissible sequence for the metric space  $(T, d)$ . Moreover, note that we  
 1177 have

$$\Delta((A_1 \times A_2)(t_1, t_2)) = \Delta(A_1(t_1)) + \Delta(A_2(t_2)) \quad (\text{S141})$$

1178 for all sets  $A_1 \subseteq T_1$ ,  $A_2 \subseteq T_2$  and  $t_1 \in T_1$ ,  $t_2 \in T_2$ . As a result, if we write  $B_n(t_1, t_2) = A_{n-1}^1(t_1) \times$   
 1179  $A_{n-1}^2(t_2)$  for the unique set in  $\mathcal{B}_n$  for which the point  $(t_1, t_2)$  lies within it, then we have that

$$\sum_{n \geq 0} 2^{n/\alpha} \Delta(B_n(t_1, t_2)) \leq 2^\alpha \left( \sum_{n \geq 1} 2^{(n-1)/\alpha} \Delta(A_{n-1}^1(t_1)) + \sum_{n \geq 1} 2^{(n-1)/\alpha} \Delta(A_{n-1}^2(t_2)) \right). \quad (\text{S142})$$

1180 In particular, taking supremum over all  $t \in T$  then gives the result, as the resulting LHS is lower  
 1181 bounded by  $\gamma_\alpha(T, d)$ , and the resulting RHS is upper bounded by  $2(\gamma_\alpha(T_1, d_1) + \gamma_\alpha(T_2, d_2))$ .

1182 For part c), the first inequality is Corollary 2.3.2 in Talagrand [42]. As for the second inequality, note  
 1183 that if  $\epsilon \leq e_n(T)$ , then  $N(T, d, \epsilon) > 2^{2^n}$  and consequently  $N(T, d, \epsilon) \geq 2^{2^n} + 1$  (recall that both  
 1184 quantities are integers). Writing  $N_n = 2^{2^n}$ , this implies that

$$(\log(1 + N_n))^{1/\alpha} (e_n(T) - e_{n+1}(T)) \leq \int_{e_{n+1}(T)}^{e_n(T)} (\log N(T, d, \epsilon))^\alpha d\epsilon. \quad (\text{S143})$$

1185 As  $\log(1 + N_n) \leq 2^n \log(2)$  for all  $n \geq 0$ , summation over all  $n \geq 0$  implies that

$$(\log 2)^{1/\alpha} \sum_{n \geq 0} 2^{n/\alpha} (e_n(T) - e_{n+1}(T)) \leq \int_0^{e_0(T)} (\log N(T, d, \epsilon))^\alpha d\epsilon. \quad (\text{S144})$$

1186 As we have that

$$\sum_{n \geq 0} 2^{n/\alpha} (e_n(T) - e_{n+1}(T)) \geq (1 - 2^{1/\alpha}) \sum_{n \geq 0} 2^{n/\alpha} e_n(T), \quad (\text{S145})$$

1187 combining this and the prior inequality gives the stated result.

1188 For part d), we can calculate that

$$\int_0^\infty (\log N(B_A, d, \epsilon))^{1/\alpha} d\epsilon \leq \int_0^{3A} m^{1/\alpha} (\log(3A/\epsilon))^{1/\alpha} d\epsilon \leq 3Am^{1/\alpha} \int_0^1 (\log(1/y))^{1/\alpha} dy. \quad (\text{S146})$$

1189 For the remaining integral, note that if we make the substitution  $y = \exp(-t^\alpha)$ , then the integral  
 1190 equals

$$\int_0^1 (\log(1/y))^{1/\alpha} dy = \alpha \int_0^\infty t^\alpha e^{-t^\alpha} dt, \quad (\text{S147})$$

1191 which we recognize as the mean of an  $\text{Exp}(1)$  random variable in the case where  $\alpha = 1$ , and the  
 1192 variance of an unnormalized  $N(0, 2)$  density in the case where  $\alpha = 2$ , and so in both cases the integral  
 1193 is finite. The desired conclusion follows.  $\square$

1194 Before stating a corollary of this result involving bounds on the  $\gamma$ -functional of some of the sets  
 1195 introduced in Theorem S5, we discuss some of the properties of these sets.

1196 **Lemma S19.** *Define the sets*

$$\mathcal{B}_F(A) := \{U \in \mathbb{R}^{n \times d} \mid \|U\|_F \leq A\}, \quad (\text{S148})$$

$$\mathcal{B}_{2,\infty}(A) := \{U \in \mathbb{R}^{n \times d} \mid \|U\|_{2,\infty} \leq A\}. \quad (\text{S149})$$

1197 *Moreover, define the metrics*

$$d_F((U_1, V_1), (U_2, V_2)) := \|U_1 - U_2\|_F + \|V_1 - V_2\|_F \quad (\text{S150})$$

$$d_{2,\infty}((U_1, V_1), (U_2, V_2)) := \|U_1 - U_2\|_{2,\infty} + \|V_1 - V_2\|_{2,\infty} \quad (\text{S151})$$

1198 *defined on the space  $\mathbb{R}^{n \times d} \times \mathbb{R}^{n \times d}$  of pairs of  $n \times d$  matrices. Then we have that for  $U_1, U_2, V_1, V_2 \in$   
 1199  $\mathcal{B}_F(A_F) \cap \mathcal{B}_{2,\infty}(A_{2,\infty})$  that*

$$\|U_1 V_1^T - U_2 V_2^T\|_F \leq A_F d_F((U_1, V_1), (U_2, V_2)), \quad \|U_1 V_1^T - U_2 V_2^T\|_\infty \leq A_{2,\infty} d_{2,\infty}((U_1, V_1), (U_2, V_2)). \quad (\text{S152})$$

1200 *Moreover, if  $U \in \mathcal{B}_{2,\infty}(A)$ , then  $U \in \mathcal{B}_F(\sqrt{n}A)$  also, and consequently if  $U \in \mathcal{B}_{2,\infty}(A_{2,\infty})$  then  
 1201 we have that  $U \in \mathcal{B}_{2,\infty}(A_{2,\infty}) \cap \mathcal{B}_F(\sqrt{n}A_{2,\infty})$ .*

1202 *Proof.* Begin by noting that, if  $U_1, V_1, U_2, V_2 \in \mathbb{R}^{n \times d}$  are matrices, then we have that

$$\|U_1 V_1^T - U_2 V_2^T\|_F = \|U_1(V_1 - V_2)^T + (U_1 - U_2)V_2^T\|_F \leq \|U_1\|_F \|V_1 - V_2\|_F + \|U_1 - U_2\|_F \|V_2\|_F$$

1203 and similarly

$$\|U_1 V_1^T - U_2 V_2^T\|_\infty = \|U_1(V_1 - V_2)^T + (U_1 - U_2)V_2^T\|_\infty \leq \|U_1\|_{2,\infty} \|V_1 - V_2\|_{2,\infty} + \|U_1 - U_2\|_{2,\infty} \|V_2\|_{2,\infty}.$$

1204 As a result, we therefore have that in the case where  $U_1, V_1, U_2, V_2$  all have  $\|\cdot\|_F \leq A_F$ , then

$$\|U_1 V_1^T - U_2 V_2^T\|_F \leq A_F (\|U_1 - U_2\|_F + \|V_1 - V_2\|_F) \quad (\text{S153})$$

1205 and similarly if each of  $U_1, V_1, U_2, V_2$  have  $\|\cdot\|_{2,\infty} \leq A_{2,\infty}$  then

$$\|U_1 V_1^T - U_2 V_2^T\| \leq A_{2,\infty} (\|U_1 - U_2\|_{2,\infty} + \|V_1 - V_2\|_{2,\infty}), \quad (\text{S154})$$

1206 giving the first result of the lemma. The second part follows by noting that

$$\sum_{i=1}^n \sum_{j=1}^d |u_{ij}|^2 \leq n \max_{i \in [n]} \sum_{j=1}^d |u_{ij}|^2 \quad (\text{S155})$$

1207 and taking square roots.  $\square$

1208 **Corollary S20.** With the same notation as in Lemma S19, and writing  $T = \mathcal{B}_F(A_F) \cap \mathcal{B}_{2,\infty}(A_{2,\infty})$ ,  
1209 we have that for any constant  $C > 0$  that

$$\gamma_\alpha(T \times T, Cd_F) \leq \gamma_\alpha(B_F(A_F), Cd_F) \leq K(\alpha) \cdot CA_F(nd)^{1/\alpha} \leq K(\alpha) \cdot CA_{2,\infty} n^{1/2+1/\alpha} d^{1/\alpha}, \quad (\text{S156})$$

$$\gamma_\alpha(T \times T, Cd_{2,\infty}) \leq \gamma_\alpha(B_{2,\infty}(A_{2,\infty}), Cd_F) \leq K(\alpha) \cdot CA_{2,\infty}(nd)^{1/\alpha}. \quad (\text{S157})$$

1210 *Proof.* This is a combination of Lemma S18 and Lemma S19  $\square$

1211 We now state a result which illustrates the usefulness of the above quantity when trying to control the  
1212 supremum of empirical processes on a metric space  $(T, d)$ .

1213 **Theorem S21.** Suppose  $(X_t)_{t \in T}$  is a mean-zero stochastic process, where  $d_1$  and  $d_2$  are two  
1214 metrics on  $T$ . Suppose for all  $s, t \in T$  we have the inequality

$$\mathbb{P}(|X_s - X_t| \geq u) \leq 2 \exp \left( - \min \left\{ \frac{u^2}{d_2(s, t)^2}, \frac{u}{d_1(s, t)} \right\} \right). \quad (\text{S158})$$

1215 Then we have that

$$\mathbb{P} \left( \sup_{s, t \in T} |X_s - X_t| \geq Lu(\gamma_2(T, d_2) + \gamma_1(T, d_1)) \right) \leq L \exp(-u). \quad (\text{S159})$$

1216 *Proof.* This can be found within the proof of Theorem 2.2.23 in Talagrand [42].  $\square$

1217 **Corollary S22.** With the notation of Theorem S5, Lemma S19 and Corollary S20, if we have the  
1218 bound

$$\mathbb{P}(|E_n(U, V) - E_n(\tilde{U}, \tilde{V})| \geq u) \quad (\text{S160})$$

$$\leq 2 \exp \left( - \min \left\{ \frac{u^2}{128 \rho_n^{-1} n^{-4} A_F^2 d_F((U, V), (\tilde{U}, \tilde{V}))^2}, \frac{u}{16 \rho_n^{-1} n^{-2} A_{2,\infty} d_{2,\infty}((U, V), (\tilde{U}, \tilde{V}))} \right\} \right) \quad (\text{S161})$$

1219 then as a consequence we can deduce that

$$\sup_{(U, V), (\tilde{U}, \tilde{V}) \in T \times T} |E_n(U, V) - E_n(\tilde{U}, \tilde{V})| = O_p \left( A_{2,\infty}^2 \left( \frac{d}{n \rho_n} \right)^{1/2} + A_{2,\infty}^2 \frac{d}{n \rho_n} \right) \quad (\text{S162})$$

1220 *Proof.* This is a consequence of Corollary S20 and Theorem S21.  $\square$

### 1221 E.3 Matrix Algebra

1222 **Proposition S23.** Suppose that we have matrices  $U, X \in \mathbb{R}^{n \times d}$  with  $n \geq d$ , and suppose that  $X$  is a  
1223 full rank matrix so  $\sigma_d(XX^T) > 0$ . Then we have that

$$\min_{Q \in O(d)} \frac{1}{n} \|U - XQ\|_F^2 \leq \frac{n^{-2} \|UU^T - XX^T\|_F^2}{\sqrt{2}(\sqrt{2} - 1)n^{-1}\sigma_d(XX^T)}. \quad (\text{S163})$$

1224 Now instead suppose we have matrices  $U, V \in \mathbb{R}^{n \times d}$  and a matrix  $M \in \mathbb{R}^{n \times d}$  of rank  $d$ . Let  $M =$   
1225  $U_M \Sigma V_M^T$  be a SVD of  $M$ . Moreover suppose that  $U^T U = V^T V$ , and  $\|UV^T - M\|_{op} \leq \sigma_d(M)/2$ .  
1226 Then we have that

$$\min_{Q \in O(d)} \frac{1}{n} \|U - U_M \Sigma^{1/2} Q\|_F^2 \leq \frac{2n^{-2} \|UV^T - M\|_F^2}{(\sqrt{2} - 1)n^{-1}\sigma_d(M)}. \quad (\text{S164})$$

1227 *Proof.* The first part of the theorem statement is Lemma 5.4 of Tu et al. [43]. For the second part, we  
1228 note that by Proposition S24, we can let  $U = U_M \Sigma^{1/2} Q$  and  $V = V_M \Sigma^{1/2} Q$  for some orthonormal  
1229 matrix  $Q$ , where  $\tilde{U} \tilde{\Sigma} \tilde{V}^T$  is the SVD of  $UV^T$ . As a result, we can therefore apply without loss of  
1230 generality Lemma 5.14 of Tu et al. [43], which then gives the desired statement.  $\square$

1231 **Proposition S24.** Suppose that  $U, V \in \mathbb{R}^{n \times d}$  are matrices such that  $UV^T = M$  for some rank  $d$   
1232 matrix  $M \in \mathbb{R}^{n \times n}$ . Moreover suppose that  $U^T U = V^T V$ . Let  $M = U_M \Sigma V_M^T$  be the SVD of  $M$ .  
1233 Then there exists an orthonormal matrix  $Q \in O(d)$  such that  $V = V_M \Sigma^{1/2} Q$ . In particular, the  
1234 symmetry group of the mapping  $(U, V) \rightarrow UV^T$  under the constraint  $U^T U = V^T V$  is exactly the  
1235 orthogonal group  $O(d)$ .

1236 *Proof.* Begin by noting that the condition  $U^T U = V^T V$  forces there to exist an orthonormal matrix  
1237  $R \in O(n)$  such that  $RU = V$  (e.g by Theorem 7.3.11 of Horn and Johnson [20]). As a consequence,  
1238 we therefore have that  $M = R^{-1} V V^T$ . This is a polar decomposition of  $M$ , and therefore as  
1239 the semi-positive definite factor is unique, we have that  $V V^T = (V_M \Sigma^{1/2})(V_M \Sigma^{1/2})^T$ , where  
1240  $M = U_M \Sigma V_M^T$  is the SVD of  $M$ , and we highlight that the polar decomposition of  $M$  is usually  
1241 represented by  $M = (U_M V_M^{-1}) \cdot (V_M \Sigma V_M^T)$ . As  $V V^T = (V_M \Sigma^{1/2})(V_M \Sigma^{1/2})^T$ , again by e.g  
1242 Theorem 7.3.11 of Horn and Johnson [20] we have that there exists an orthonormal matrix  $Q \in O(d)$   
1243 such that  $V = V_M \Sigma^{1/2} Q$ , giving the desired result.  $\square$

1244 **Lemma S25.** Suppose  $X \in \mathbb{R}^{n \times n}$  is a symmetric matrix such that  $X = \Pi A \Pi^T$  where  $A \in \mathbb{R}^{d \times d}$   
1245 is of full rank, and  $\Pi \in \mathbb{R}^{n \times d}$  is the assignment matrix for a partition of  $[n]$ ; that is, there exists a  
1246 partition of  $[n]$  into  $d$  sets  $B(1), \dots, B(d)$  such that  $\Pi_{il} = 1[i \in B(l)]$ . Suppose further that  $\Pi$  is of  
1247 full rank. Then we have that  $\sigma_d(X) \geq \sigma_d(A) \times \min_l |B(l)|$ .

1248 *Proof.* Let  $\Delta = \text{diag}(|B(1)|^{1/2}, \dots, |B(d)|^{1/2})$ . Then note that we can write

$$X = (\Pi \Delta^{-1}) \cdot \Delta A \Delta \cdot (\Pi \Delta)^{-1} \quad (\text{S165})$$

1249 where  $(\Pi \Delta^{-1})$  is an orthonormal matrix. As a result, we can simply concentrate on the spectrum of  
1250 the matrix  $\Delta A \Delta$ . As the smallest singular value of a matrix product is less than the product of the  
1251 smallest singular values, the stated result follows.  $\square$

### 1252 E.4 Concentration inequalities

1253 **Theorem S26.** Suppose that  $H$  is a graph on a vertex set  $\{r_1, \dots, r_l, v_1, \dots, v_m\}$  where the vertices  
1254  $r_i$  are referred to as root vertices, and the remaining vertices as free vertices. We refer to such a  
1255 graph as a rooted graph. Suppose that all the edges in  $H$  have at least one free vertex as an endpoint.  
1256 Write  $\mathbf{x} = (x_1, \dots, x_m)$  for the collection of  $m$  variables  $x_i$ , and let  $Y$  be a statistic of the form

$$Y = \sum_{x_1, \dots, x_m \in [n]} g_{\mathbf{x}} \prod_{i \sim_H j} t_{x_i, x_j} \quad (\text{S166})$$

1257 where the random variables  $t_{x_i, x_j}$  are independent and  $\{0, 1\}$  valued with  $c_p \leq \mathbb{P}(t_{x_i, x_j} = 1) \leq$   
1258  $1 - c_p$  for all  $x_i, x_j$ ; the coefficients  $c_g \leq g_{\mathbf{x}} \leq \|g\|_{\infty} < \infty$  for some  $c_g > 0$ ; and  $i \sim_H j$  iff

1259  $(i, j)$  is an edge within the graph  $H$ . Suppose that  $\rho_n = n^{-\alpha}$  for some  $\alpha < 1/m'(H)$  where  
 1260  $m'(H) = \max_{2 \leq j \leq k} (j-1)/(v(j)-2)$ ,  $v(j) = \min_{|A| \geq j} v(A)$  and  $v(A)$  for a set of edges  $A$   
 1261 indicates the number of vertices in  $A$ . Then there exist constants  $c, \delta, \Delta$  which depend only on  $c_g, c_p$ ,  
 1262  $\|g\|_\infty, H$  and  $\alpha$  such that

$$\mathbb{P}(|Y - \mathbb{E}[Y]| \geq \mathbb{E}[Y] \sqrt{\lambda(n^2 \rho_n)^{-1}}) \leq \exp(-c\lambda) \quad (\text{S167})$$

1263 for all  $\Delta \leq \lambda \leq n^\delta$ .

1264 *Proof.* Without loss of generality suppose that  $\|g\|_\infty = 1$ . The proof is essentially the same as Vu  
 1265 [47, Corollary 6.4], where we extend the result derived for the asymptotics of subgraph counts to that  
 1266 of a weighted count of rooted subgraph counts. To do so, we introduce some notation introduced  
 1267 within [47]. If  $H$  has  $k$  edges, and  $A$  is a set of pairs  $\{x_i, x_j\}$ , we write  $\partial_A T$  for the polynomial  
 1268  $\prod_{x \in A} \partial_x T$  when interpreting  $T$  as a formal sum in the variables  $a_{x_i, x_j}$  (which we recall are  $\{0, 1\}$   
 1269 valued. We then define for  $1 \leq j \leq k$  the quantities

$$\mathbb{E}_j[Y] = \max_{|A| \geq j} \mathbb{E}[\partial_A Y], M_j(Y) = \max_{t, |A| \geq j} \partial_A Y(t). \quad (\text{S168})$$

1270 Let  $v(A)$  denote the number of vertices specified within the set  $A$ , and let  $v(j) = \min_{|A| \geq j} v(A)$ .  
 1271 With this, we note that  $\mathbb{E}[Y] = \Theta(n^m \rho_n^k)$  and  $\mathbb{E}[\partial_A Y] = \Theta(n^{m-v(A)} \rho_n^{k-|A|})$ . Consequently, we  
 1272 have that

$$\mathbb{E}_j[Y] = \max_{h \geq j} \Theta(n^{m-v(h)} \rho_n^{k-h}), \mathbb{E}[Y]/\mathbb{E}_j[Y] = \Theta(\min_{h \geq j} n^{v(h)} \rho_n^h) \quad (\text{S169})$$

1273 where the implied constants depend only on  $k, c_g$  and  $c_p$ . The same arguments as given in Claim 6.2  
 1274 and Corollary 6.4 in [47] can then be applied verbatim to give the claimed result.  $\square$

1275 **Lemma S27.** Let  $T$  be a statistic of the form

$$T' = \sum_{x_1 \neq x_2 \neq \dots \neq x_m} g(\lambda_{x_1}, \dots, \lambda_{x_m}) \quad (\text{S170})$$

1276 where  $c_g \leq g(\cdot) \leq \|g\|_\infty < \infty$ . Then we have that

$$\mathbb{P}(|T' - \mathbb{E}[T']| \geq \epsilon \mathbb{E}[T']) \leq 2 \exp\left(\frac{-\epsilon^2 c_g^2 \lfloor n/m \rfloor}{2\|g\|_\infty^2}\right). \quad (\text{S171})$$

1277 Consequently, if we define

$$T_{l,k} = \sum_{x_1, x_2, \dots, x_m} g(\lambda_{x_1}, \dots, \lambda_{x_m}, \lambda_l, \lambda_k), \quad T'_{l,k} = \sum_{x_1 \neq x_2 \neq \dots \neq x_m} g(\lambda_{x_1}, \dots, \lambda_{x_m}, \lambda_l, \lambda_k) \quad (\text{S172})$$

1278 where  $c_g \leq g(\cdot) \leq \|g\|_\infty < \infty$  as above, then we have that

$$\max_{l,k} \left| \frac{T_{l,k}}{\mathbb{E}[T'_{l,k} | \lambda_l, \lambda_k]} - 1 \right| = O_p\left(\left(\frac{\log n}{n}\right)^{1/2}\right) \quad (\text{S173})$$

1279 where the implied constant depends only on  $m$  and  $c_g$ .

1280 *Proof.* The first part is an immediate consequence of Hoeffding's inequality for U-statistics [38],  
 1281 which states that for  $U = ((n-m)!/n!) \cdot T$  that

$$\mathbb{P}\left(|U - \mathbb{E}[U]| \geq t\right) \leq 2 \exp\left(\frac{-t^2 \lfloor n/m \rfloor}{2\|g\|_\infty^2}\right), \quad (\text{S174})$$

1282 by substituting in  $t \mapsto t\mathbb{E}[U]$  and making use of the bound  $\mathbb{E}[U] \geq c_g$ .

1283 For the second part, we work conditionally on  $\lambda_l, \lambda_k$  and note we can decompose  $T_{l,m}$  for each  
 1284  $l, m$  into a sum of statistics of the form  $T'$ , one of order  $\Theta_p(n^m)$  and  $\binom{m}{k}$  of order  $\Theta_p(n^{m-k})$   
 1285 (corresponding to when some of the indices  $x_i$  are equal) for  $1 \leq k \leq m$ . By applying the first  
 1286 concentration inequality to these  $m! \cdot n^2$  random variables, conditional on the  $(\lambda_l, \lambda_k)$ , we note  
 1287 the RHS is independent of these quantities, and so the probability bounds hold unconditionally.  
 1288 Consequently, we know that asymptotically  $T_{l,k}$  is asymptotic to  $T'_{l,k}$ , from which we can then apply  
 1289 the resulting concentration bound for this term.  $\square$

1290 **Theorem S28.** Suppose we have a statistic of the form

$$T_{n,\beta,J}(\lambda_u, \lambda_v) = \rho_n^{-\beta-|J|} \sum_{\alpha \in \mathcal{V}^{\beta-1}} g(\lambda_{\tilde{\alpha}_0}, \dots, \lambda_{\tilde{\alpha}_{\beta-1}}, \lambda_u, \lambda_v) \prod_{i \leq \beta} a_{\tilde{\alpha}_{i-1}, \tilde{\alpha}_i} \cdot \prod_{j \in J} a_{\tilde{\alpha}_{j-1}, \tilde{\alpha}_{j+1}} \quad (\text{S175})$$

1291 where  $\tilde{\alpha} = (\alpha, u, v)$  is a concatenation of  $\alpha$ ,  $u$  and  $v$  in order,  $g : \mathbb{R}^{\beta+1} \rightarrow \mathbb{R}$  is a positive function  
1292 which satisfies  $c_g \leq g \leq \|g\|_\infty < \infty$  for some constant  $c_g$ , and  $J$  is a possibly empty set of indices.

1293 Define  $\lambda' = (\tilde{\lambda}_0, \dots, \tilde{\lambda}_{\beta-1}, \lambda_u, \lambda_v)$  where  $\tilde{\lambda}$  is an independent copy of  $\lambda$ . Further define the statistic

$$T'_{n,\beta,J}(\lambda_u, \lambda_v) := \frac{(n-\beta)!}{n!} \cdot \mathbb{E} \left[ g(\lambda') \prod_{i \leq \beta} W(\lambda'_{i-1}, \lambda'_i) \prod_{j \in J} W(\lambda'_{j-1}, \lambda'_{j+1}) \mid \lambda_u, \lambda_v \right]. \quad (\text{S176})$$

1294 Then for any  $\rho_n = n^{-\alpha}$  for  $\alpha$  sufficiently small, we have that

$$\max_{\beta, J, u, v} \left| \frac{T_{n,\beta,J}(\lambda_u, \lambda_v)}{T'_{n,\beta,J}(\lambda_u, \lambda_v)} - 1 \right| = O_p \left( \left( \frac{(\log n)^k}{n \cdot (n\rho_n)} \right)^{1/2} \right). \quad (\text{S177})$$

1295 *Proof.* For this, we apply the above results. We begin by working conditionally on all of the  $\lambda$ , whose  
1296 collection we denote  $\lambda$ , and note that by Theorem S26 by taking  $\lambda = (\log n)^k$  for some  $k > 1$  and a  
1297 union bound, we have that

$$T_{n,\beta,J}(\lambda_u, \lambda_v) = \mathbb{E}[T_{n,\beta,J}(\lambda_u, \lambda_v) \mid \lambda] \cdot (1 + E_n^{(1)}) \text{ where } E_n^{(1)} = O \left( \left( \frac{(\log n)^k}{n \cdot (n\rho_n)} \right)^{1/2} \right) \quad (\text{S178})$$

1298 uniformly over all  $O(m^2 m! \cdot n^2)$  random variables with probability  $1 - \exp(-O((\log n)^k))$ . As we  
1299 have that

$$\mathbb{E}[T_{n,\beta,J}(\lambda_u, \lambda_v) \mid \lambda] = \sum_{\alpha \in \mathcal{V}^{\beta-1}} g(\lambda_{\tilde{\alpha}_0}, \dots, \lambda_{\tilde{\alpha}_{\beta-1}}, \lambda_u, \lambda_v) \prod_{i \leq \beta} W(\lambda_{\tilde{\alpha}_{i-1}}, \lambda_{\tilde{\alpha}_i}) \cdot \prod_{j \in J} W(\lambda_{\tilde{\alpha}_{j-1}}, \lambda_{\tilde{\alpha}_{j+1}}) \quad (\text{S179})$$

1300 where the function is bounded below by  $c_g \cdot c_p^{\beta+|J|}$  and is bounded above by  $\|g\|_\infty$ , we can make use  
1301 of Lemma S27 to show that

$$\max_{\beta, J, u, v} \left| \frac{\mathbb{E}[T_{n,\beta,J}(\lambda_u, \lambda_v) \mid \lambda]}{T'_{n,\beta,J}(\lambda_u, \lambda_v)} - 1 \right| = O_p \left( \left( \frac{\log n}{n} \right)^{1/2} \right) \quad (\text{S180})$$

1302 from which the claimed result follows.  $\square$

1303 **Remark 1.** One natural question to ask about the necessity of the range of values of  $\rho_n$  specified  
1304 above. Generally speaking, one can show for Erdos-Renyi graphs  $G(n, p)$  that the number of  
1305 subgraphs  $Y_H$  of  $H$  in  $\mathcal{G}_n$  satisfy a zero-one law, where

$$\mathbb{P}(Y_H = 0) = \begin{cases} 1 - o(1) & \text{if } p \ll n^{-c(H)}, \\ o(1) & \text{if } p \gg n^{-c(H)} \end{cases} \quad (\text{S181})$$

1306 for some constant  $c(H)$  which relates to the geometry of the graph  $G$  [6]. In the latter regime, one  
1307 can then show that  $Y_H \sim \mathbb{E}[Y_H]$  asymptotically again, and in the former this shows that the term  
1308 is asymptotically negligible. As the purpose of this result is to derive an asymptotic expansion for  
1309 the sum of various statistics of the form of  $T$  to the highest order, provided  $\rho_n$  is of an order which  
1310 avoids any of the "phase transition" stages of the form above we could eventually generalize our  
1311 results further. As this involves even more additional book-keeping, we do not do so here.

1312 **Lemma S29.** Let  $I$  be a finite index set of size  $|I| = m$ . Suppose that there exist constants  $\tau > 0$ ,  
1313 a bounded non-negative sequence  $(p_i)_{i \in I}$  such that  $p_i \leq \tau^{-1}$  for all  $i$ , and a real sequence  $(t_i)_{i \in I}$ .  
1314 Define the random variable

$$X = \frac{1}{m} \sum_{i \in I} (\tau^{-1} a_i - p_i) t_i \quad \text{where} \quad a_i \stackrel{\text{indep}}{\sim} \text{Bernoulli}(\tau p_i) \text{ for } i \in I. \quad (\text{S182})$$

1315 Then for all  $u > 0$ , we have that

$$\mathbb{P}(|X| \geq u) \leq 2 \exp \left( - \min \left\{ \frac{u^2}{4\tau^{-1}m^{-2}\|t\|_2^2}, \frac{u}{2\tau^{-1}m^{-1}\|t\|_\infty} \right\} \right). \quad (\text{S183})$$

1316 *Proof.* This follows by an application of Bernstein's inequality, by noting that  $X$  is a sum of  
 1317 independent mean zero random variables  $X_i = m^{-1}(\tau^{-1}a_i - p_i)t_i$  which satisfy

$$|X_i| \leq \tau^{-1}m^{-1}|t_i| \leq \tau^{-1}m^{-1}\|t\|_\infty \text{ for all } i, \quad \mathbb{E}[X_i^2] \leq m^{-2}\tau^{-1}t_i^2. \quad \square$$

1318 **Lemma S30.** Define the random variable

$$Y = \frac{1}{n(n-1)} \sum_{i \neq j} (\rho_n^{-1}a_{ij} - W(\lambda_i, \lambda_j))T_{ij} \quad (\text{S184})$$

1319 for some constants  $(T_{ij})$ . Write  $\|T\|_2^2 = \sum_{i \neq j} T_{ij}^2$  and  $\|T\|_\infty = \max_{i \neq j} |T_{ij}|$ . Then we have that

$$\mathbb{P}(|Y| \geq u) \leq 2 \exp \left( - \min \left\{ \frac{u^2}{128\rho_n^{-1}n^{-4}\|T\|_2^2}, \frac{u}{16\rho_n^{-1}n^{-2}\|T\|_\infty} \right\} \right) \quad (\text{S185})$$

1320 In particular, when  $T_{ij} = 1$  for all  $i \neq j$ , we have that  $Y = O_p((n^2\rho_n)^{-1/2})$ .

1321 *Proof.* Note that under the assumptions on the model (where we have that  $a_{ij} = a_{ji}$  and  $W(\lambda_i, \lambda_j) =$   
 1322  $W(\lambda_j, \lambda_i)$  for all  $i \neq j$ ), we can write

$$Y = \frac{2}{n(n-1)/2} \sum_{i < j} (\rho_n^{-1}a_{ij} - W(\lambda_i, \lambda_j))(T_{ij} + T_{ji}). \quad (\text{S186})$$

1323 Note that

$$\sum_{i < j} (T_{ij} + T_{ji})^2 \leq 2 \sum_{i < j} (T_{ij}^2 + T_{ji}^2) \leq 2\|T\|_2^2, \quad (\text{S187})$$

$$\max_{i < j} |T_{ij} + T_{ji}| \leq \max_{i < j} |T_{ij}| + \max_{i < j} |T_{ji}| \leq 2\|T\|_\infty, \quad (\text{S188})$$

1324 where we have used the inequality  $(a+b)^2 \leq 2(a^2 + b^2)$  which holds for all  $a, b \in \mathbb{R}$ . Consequently,  
 1325 as a result of Lemma S29, we have conditional on  $\lambda$  that

$$\mathbb{P}(|Y| \geq u \mid \lambda) \leq 2 \exp \left( - \min \left\{ \frac{u^2}{128\rho_n^{-1}n^{-4}\|T\|_2^2}, \frac{u}{16\rho_n^{-1}n^{-2}\|T\|_\infty} \right\} \right) \quad (\text{S189})$$

1326 As the right hand side has no dependence on  $\lambda$ , taking expectations gives the first part of the lemma  
 1327 statement. For the second part, note that if  $T_{ij} = 1$  for all  $i \neq j$ , then we have that  $\|T\|_2^2 \leq n^2$  and  
 1328  $\|T\|_\infty = 1$ , and consequently

$$\mathbb{P}(|Y| \geq u) \leq 2 \exp \left( - \min \left\{ \frac{u^2}{128\rho_n^{-1}n^{-2}}, \frac{u}{16\rho_n^{-1}n^{-2}} \right\} \right) \quad (\text{S190})$$

1329 In particular, this implies that  $Y = O_p((n^2\rho_n)^{-1/2})$ .  $\square$

## 1330 E.5 Miscellaneous results

1331 **Lemma S31.** Suppose that  $A \in \mathbb{R}^{m \times m}$  is a matrix whose diagonal entries are  $\alpha$ , and off-diagonal  
 1332 entries are  $\beta$ , so  $A_{ij} = \alpha\delta_{ij} + \beta(1 - \delta_{ij})$ , where  $\delta_{ij}$  is the Kronecker delta. Then  $A$  has an eigenvalue  
 1333  $\alpha + (m-1)\beta$  of multiplicity one with eigenvector  $1_m$ , and an eigenvalue  $\alpha - \beta$  of multiplicity  $m-1$ ,  
 1334 whose eigenvectors form an orthonormal basis of the subspace  $\{v : \langle v, 1_m \rangle = 0\}$ . For the subspace  
 1335  $\{v : \langle v, 1_m \rangle = 0\}$ , we can take the eigenvectors to be

$$v_i = \frac{1}{\sqrt{2}}(e_{m,1} - e_{m,i+1}) \text{ for } i \in [m-1]$$

1336 where  $e_{m,i}$  are the unit column vectors in  $\mathbb{R}^m$ . The singular values of  $A$  are  $|\alpha - \beta|$  and  $|\alpha + (m-1)\beta|$ .  
 1337 Consequently, we can write  $A = UV^T$  for matrices  $U, V \in \mathbb{R}^{m \times m}$  with  $UU^T = VV^T$ , where the  
 1338 rows of  $U$  satisfy

$$U_{1\cdot} = \frac{|\alpha + \beta(m-1)|^{1/2}}{\sqrt{m}}e_{m,1} + \frac{|\alpha - \beta|^{1/2}}{\sqrt{2}}e_{m,2} \quad (\text{S191})$$

$$U_{i\cdot} = \frac{|\alpha + \beta(m-1)|^{1/2}}{\sqrt{m}}e_{m,1} - \frac{|\alpha - \beta|^{1/2}}{\sqrt{2}}e_{m,i} \text{ for } i \in \{2, \dots, m\}. \quad (\text{S192})$$

1339 Consequently, we then have that  $\|U_{i\cdot}\|_2 \leq (2|\alpha + \beta(m-1)|/m + |\alpha - \beta|/2)^{1/2}$  for all  $i$ , and  
 1340  $\min_{i \neq j} \|U_{i\cdot} - U_{j\cdot}\|_2 = (|\alpha - \beta|)^{1/2}$ .

1341 Further suppose that  $\beta = -\alpha/(m-1)$ . Then provided  $\alpha > 0$ ,  $A$  is positive semi-definite, is of rank  
 1342  $m-1$ , with a singular non-zero eigenvalue  $\alpha m/(m-1)$  of multiplicity  $m-1$ . Consequently one  
 1343 can write  $A = UU^T$  where  $U \in \mathbb{R}^{m \times (m-1)}$  and whose columns equal the  $\sqrt{\alpha m/(m-1)}v_i$ . In  
 1344 particular, the rows of  $U$  equal

$$U_{1\cdot} = \left(\frac{\alpha m}{2(m-1)}\right)^{1/2} e_{m-1,1}^T, \quad U_{i\cdot} = -\left(\frac{\alpha m}{2(m-1)}\right)^{1/2} e_{m-1,i-1}^T \text{ for } i \in [2, m].$$

1345 Consequently, one has that  $\|U_{i\cdot}\|_2 = \sqrt{\alpha m/(m-1)}$  for all  $i$ , and moreover we have the separability  
 1346 condition  $\min_{1 \leq i < j \leq m} \|U_{i\cdot} - U_{j\cdot}\|_2 = (\alpha m/(m-1))^{1/2}$ .

1347 *Proof.* It is straightforward to verify that  $A$  has an eigenvalue of  $\alpha + (n-1)\beta$  with the claimed  
 1348 eigenvector. For the second part, we note that the characteristic polynomial of  $A$  is

$$\det(A - tI) = (\alpha - \beta - t)^{n-1} \cdot (\alpha + (n-1)\beta - t)$$

1349 and so  $A$  has  $m-1$  eigenvalues equal to  $\alpha - \beta$ ; as  $A$  is symmetric, we know that we can always take  
 1350 eigenvectors to be orthogonal to each other, and consequently the eigenspace associated with such an  
 1351 eigenvalue must be a subspace of  $\{v : \langle v, 1_m \rangle = 0\}$ . As both of these subspaces are of dimension  
 1352  $m-1$ , it consequently follows that they are equal. We then highlight that if  $A$  is a symmetric  
 1353 matrix with eigendecomposition  $A = Q\Lambda Q^T$  for an orthogonal matrix  $Q$ , then the SVD is given by  
 1354  $Q|\Lambda|\text{sgn}(\Lambda)Q^T$ , and we can write  $A = UV^T$  with  $U = Q|\Lambda|^{1/2}$  and  $V = Q\text{sgn}(\Lambda)|\Lambda|^{1/2}$  such that  
 1355  $UU^T = VV^T$ . This allows us to derive the remaining statements about the matrix  $A$  which hold in  
 1356 generality. The remaining parts discussing what occurs when  $\beta = -\alpha/(m-1)$  follow by routine  
 1357 calculation.  $\square$

1358 **Lemma S32.** Let  $\sigma(x) = (1 + \exp(-x))^{-1}$  be the sigmoid function. Then there exists a unique  
 1359  $y \in \mathbb{R}$  which solves the equation

$$\alpha\sigma(y) = \beta + \gamma\sigma(-y/s) \quad (\text{S193})$$

1360 for  $\alpha, \gamma, s > 0$  and  $\beta \in \mathbb{R}$  if and only if  $\beta < \alpha$  and  $\beta + \gamma > 0$ . Moreover,  $y > 0$  if and only if  
 1361  $\beta + \gamma/2 > \alpha/2$ .

1362 *Proof.* Note that  $\alpha\sigma(x)$  is a function whose range is  $(0, \alpha)$  on  $x \in (-\infty, \infty)$ , and is strictly monotone  
 1363 increasing on the domain. Similarly,  $\beta + \gamma\sigma(-y/s)$  is strictly monotone decreasing with range  
 1364  $(\beta, \beta + \gamma)$ , and so simple geometric considerations of the graphs of the two functions gives the  
 1365 existence result. For the second part, note that the ranges of the functions on the LHS and the RHS on  
 1366 the range  $y > 0$  are  $[\alpha/2, \alpha)$  and  $(\beta, \beta + \gamma/2]$  respectively, and so the same considerations as above  
 1367 give the second claim.  $\square$

1368 **Lemma S33.** Let  $\sigma(x) = (e^x)/(1 + e^x)$  be the sigmoid function. Then for any  $x, y \in \mathbb{R}$ , we have  
 1369 that

$$-\log(1 - \sigma(x)) \geq -\log(1 - \sigma(y)) + \sigma(y)(x - y) + E(x - y) \quad (\text{S194})$$

1370 where

$$E(z) = \begin{cases} \frac{1}{2}e^{-A}z^2 & \text{if } |x|, |y| \leq A, \\ \frac{1}{4}e^{-A} \min\{z^2, 2|z|\} & \text{if either } |x| \leq A \text{ or } |y| \leq A. \end{cases} \quad (\text{S195})$$

1371 *Proof.* Note that by the integral version of Taylor's theorem, for a twice differentiable function  $f$  one  
 1372 has for all  $x, y \in \mathbb{R}$  that

$$f(x) = f(y) + f'(y)(x - y) + \int_0^1 (1 - t)f''(tx + (1 - t)y)(x - y)^2 dt. \quad (\text{S196})$$

1373 Applying this to  $f(x) = -\log \sigma(x)$  gives

$$-\log \sigma(x) = -\log \sigma(y) + (-1 + \sigma(y))(x - y) + \int_0^1 (1 - t)(x - y)^2 \sigma'(tx + (1 - t)y) dt \quad (\text{S197})$$



1374 where  $\sigma'(x) = e^x/(1 + e^x)^2$ . Applying this to  $f(x) = \log(1 - \sigma(x))$  gives

$$-\log(1 - \sigma(x)) = -\log(1 - \sigma(y)) + \sigma(y)(x - y) + \int_0^1 (1 - t)(x - y)^2 \sigma'(tx + (1 - t)y) dt \quad (\text{S198})$$

1375 As the integral terms are the same, we concentrate on lower bounding this quantity. To do so, we  
 1376 make use of the lower bound  $\sigma'(x) \geq e^{-|x|}/4$  (Lemma 68 of Davison and Austern [11]) which holds  
 1377 for all  $x \in \mathbb{R}$ . We then note that if  $|x|, |y| \leq A$ , then we have that

$$-\log(1 - \sigma(x)) = -\log(1 - \sigma(y)) + \sigma(y)(x - y) + \int_0^1 (1 - t)(x - y)^2 \sigma'(tx + (1 - t)y) dt \quad (\text{S199})$$

$$\geq -\log(1 - \sigma(y)) + \sigma(y)(x - y) + \frac{e^{-|A|}}{2}(x - y)^2. \quad (\text{S200})$$

1378 Alternatively, if we only make use of the fact that  $|x| \leq A$  (without loss of generality - the argument  
 1379 is essentially equivalent if we only assume that  $|y| \leq A$ ), then we have that

$$\int_0^1 (1 - t) \sigma'(tx + (1 - t)y)(x - y)^2 dt \geq \int_0^1 (1 - t) e^{-|tx + (1 - t)y|} (x - y)^2 dt \quad (\text{S201})$$

$$\geq \int_0^1 (1 - t) e^{-|x|} e^{-(1 - t)|x - y|} (x - y)^2 dt \quad (\text{S202})$$

$$= e^{-|x|} \{ |x - y| + e^{-|x - y|} - 1 \} \quad (\text{S203})$$

$$\geq \frac{1}{4} e^{-A} \min\{(x - y)^2, 2|x - y|\}, \quad (\text{S204})$$

1380 and consequently we get that

$$-\log(1 - \sigma(x)) \geq -\log(1 - \sigma(y)) + \sigma(y)(x - y) + \frac{1}{4} e^{-A} \min\{|x - y|^2, 2|x - y|\} \quad (\text{S205})$$

1381 as claimed.  $\square$

1382 **Lemma S34.** Suppose that we have a function

$$f(X) = \frac{1}{m^2} \sum_{i,j=1}^m \min\{X_{ij}^2, 2|X_{ij}|\}. \quad (\text{S206})$$

1383 Then if  $f(X) \leq r$ , we have that  $m^{-2} \sum_{i,j=1}^m |X_{ij}| \leq r + r^{1/2}$ .

1384 *Proof.* To proceed, note that if we have that

$$\mathbb{E}[\min\{X^2, 2X\}] \leq r \quad (\text{S207})$$

1385 for a non-negative random variable  $X$ , then by Jensen's inequality we get that

$$(\mathbb{E}[X1[X < 2]])^2 + \mathbb{E}[X1[X \geq 2]] \leq \mathbb{E}[\min\{X^2, 2X\}] \leq r \quad (\text{S208})$$

1386 and consequently  $\mathbb{E}[X] \leq r + r^{1/2}$  by decomposing  $\mathbb{E}[X]$  into the parts where  $X \geq 2$  and  $X < 2$ .  
 1387 Applying this result to the empirical measure on the  $|X_{ij}|$  across indices  $i, j \in [m]$  gives the desired  
 1388 result.  $\square$

## 1389 **F Minimizers for degree corrected SBMs when $\alpha \neq 1$**

1390 In this section, we give an informal discussion of how to study the minimizers of  $\mathcal{R}_n(M)$  for degree  
 1391 corrected SBMs when the unigram parameter  $\alpha \neq 1$ . We begin by highlighting that  $\mathcal{R}_n(M)$  does not  
 1392 concentrate around its expectation when averaging over only the degree heterogeneity parameters  $\theta_i$ ,  
 1393 which rules out using a similar proof approach as to what was carried out earlier in Appendix 1.

1394 Recall that we were able to derive that the global minima of  $\mathcal{R}_n(M)$  was the matrix

$$M_{ij}^* = \log \left( \frac{2\mathcal{E}_W(\alpha)}{(1+k^{-1})\mathbb{E}[\theta]\mathbb{E}[\theta]^\alpha} \cdot \frac{P_{c(i),c(j)}}{\tilde{P}_{c(i)}\tilde{P}_{c(j)} \cdot (\theta_i^{\alpha-1}\tilde{P}_{c(i)}^{\alpha-1} + \theta_j^{\alpha-1}\tilde{P}_{c(j)}^{\alpha-1})} \right). \quad (\text{S209})$$

1395 When  $\alpha = 1$  or the  $\theta_i$  are constant, this allows us to write  $M^* = \Pi M \Pi^T$  where  $\Pi$  is the matrix  
 1396 of community assignments for the network and  $M$  is some matrix, which allows us to simplify the  
 1397 problem. If we supposed that the  $\theta$  actually had some dependence on the  $c(i)$  and were discrete - in  
 1398 that  $\theta_i|c(i) = l \sim Q_l$  for some discrete distributions  $Q_l$  for  $l \in [\kappa]$ , then we could in fact employ the  
 1399 same type of argument as done throughout the paper. The major change is that then the embedding  
 1400 vectors would each concentrate around a vector decided by both a) their community assignment, and  
 1401 b) the particular degree correction parameter they were assigned. This would then potentially effect  
 1402 our ability to perform community detection depending on the underlying geometry of these vectors.  
 1403 One possible idea would be to explore  $\mathcal{R}_n(M)$  partially averaged over the  $\theta_i$  - we divide the  $\theta_i$  into  
 1404  $B$  bins where  $B = n^\beta$  for some  $\beta \in (0, 1)$ , and average over only over the refinement of the  $\theta_i$  as  
 1405 belonging to the different bins. This would be similar to the argument employed in Davison and  
 1406 Austern [11].

1407 An alternative perspective to give some type of guarantee on the concentration of the embedding  
 1408 vectors is to study the rank of the matrix  $M^*$ . If we are able to prove that is of finite rank  $r$  even  
 1409 as  $n$  grows large, then we are able to give a convergence result for the embeddings as soon as the  
 1410 embedding dimension  $d$  is greater than or equal to  $r$ . To study this, it suffices to look at the matrix

$$(M_E^*)_{ij} = \log (\theta_i^{\alpha-1}\tilde{P}_{c(i)}^{\alpha-1} + \theta_j^{\alpha-1}\tilde{P}_{c(j)}^{\alpha-1}) \quad (\text{S210})$$

1411 and argue that this is low rank (due to the logarithm, we can write  $M^*$  as the difference between  
 1412 this matrix and a matrix of rank  $\kappa$ , which is therefore also low rank). The entry-wise logarithm is a  
 1413 complicating factor here, as otherwise it is straightforward to argue that the entry-wise exponential of  
 1414 this matrix is of rank 2. One can reduce studying the rank of the matrix  $M_E^*$  to studying the rank of  
 1415 the kernel

$$K_M((x, c_x), (y, c_y)) = \log (x^{\alpha-1}\tilde{P}_{c_x}^{\alpha-1} + y^{\alpha-1}\tilde{P}_{c_y}^{\alpha-1}) \quad (\text{S211})$$

1416 of an operator  $L^2(P) \rightarrow L^2(P)$ , where  $P$  is the product measure induced by  $\theta$  and the community  
 1417 assignment mechanism  $c$ . As  $K_M$  is of finite rank  $r$  if and only if it can be written as

$$K_M((x, c_x), (y, c_y)) = \sum_{i=1}^r \phi_i(x, c_x) \psi_i(y, c_y) \quad (\text{S212})$$

1418 for some functions  $\phi_i, \psi_i$ , it follows that the matrix  $(M_E^*)_{ij}$  will be of finite rank  $r$  also. Indeed, this  
 1419 representation forces that  $M_E^* = \Phi \Psi^T$  for some matrices  $\Phi, \Psi \in \mathbb{R}^{n \times r}$ , meaning that  $M_E^*$  is of rank  
 1420  $\leq r$ ; Corollary 5.5 of Koltchinskii and Giné [23] then guarantees convergence of the eigenvalues of  
 1421 the matrix  $M_E^*$  to the operator  $K_M$  so that  $M_E^*$  is actually of full rank.

## 1422 NeurIPS Paper Checklist

### 1423 1. Claims

1424 Question: Do the main claims made in the abstract and introduction accurately reflect the  
1425 paper's contributions and scope?

1426 Answer: [\[Yes\]](#)

1427 Justification: The claims in the abstract and introduction match the theoretical contributions  
1428 of the paper. These are supported by experimental verification. Similarly, where theoretical  
1429 results are not obtained we investigate these scenarios using simulation.

1430 Guidelines:

- 1431 • The answer NA means that the abstract and introduction do not include the claims  
1432 made in the paper.
- 1433 • The abstract and/or introduction should clearly state the claims made, including the  
1434 contributions made in the paper and important assumptions and limitations. A No or  
1435 NA answer to this question will not be perceived well by the reviewers.
- 1436 • The claims made should match theoretical and experimental results, and reflect how  
1437 much the results can be expected to generalize to other settings.
- 1438 • It is fine to include aspirational goals as motivation as long as it is clear that these goals  
1439 are not attained by the paper.

### 1440 2. Limitations

1441 Question: Does the paper discuss the limitations of the work performed by the authors?

1442 Answer: [\[Yes\]](#)

1443 Justification: We highlight and discuss the assumptions required for the theoretical results  
1444 presented within the paper and in detail in the appendix. We demonstrate empirically the  
1445 performance of our procedure when these assumptions are relaxed, if theoretical results  
1446 were not obtained.

1447 Guidelines:

- 1448 • The answer NA means that the paper has no limitation while the answer No means that  
1449 the paper has limitations, but those are not discussed in the paper.
- 1450 • The authors are encouraged to create a separate "Limitations" section in their paper.
- 1451 • The paper should point out any strong assumptions and how robust the results are to  
1452 violations of these assumptions (e.g., independence assumptions, noiseless settings,  
1453 model well-specification, asymptotic approximations only holding locally). The authors  
1454 should reflect on how these assumptions might be violated in practice and what the  
1455 implications would be.
- 1456 • The authors should reflect on the scope of the claims made, e.g., if the approach was  
1457 only tested on a few datasets or with a few runs. In general, empirical results often  
1458 depend on implicit assumptions, which should be articulated.
- 1459 • The authors should reflect on the factors that influence the performance of the approach.  
1460 For example, a facial recognition algorithm may perform poorly when image resolution  
1461 is low or images are taken in low lighting. Or a speech-to-text system might not be  
1462 used reliably to provide closed captions for online lectures because it fails to handle  
1463 technical jargon.
- 1464 • The authors should discuss the computational efficiency of the proposed algorithms  
1465 and how they scale with dataset size.
- 1466 • If applicable, the authors should discuss possible limitations of their approach to  
1467 address problems of privacy and fairness.
- 1468 • While the authors might fear that complete honesty about limitations might be used by  
1469 reviewers as grounds for rejection, a worse outcome might be that reviewers discover  
1470 limitations that aren't acknowledged in the paper. The authors should use their best  
1471 judgment and recognize that individual actions in favor of transparency play an important  
1472 role in developing norms that preserve the integrity of the community. Reviewers  
1473 will be specifically instructed to not penalize honesty concerning limitations.

### 1474 3. Theory Assumptions and Proofs

Question: For each theoretical result, does the paper provide the full set of assumptions and a complete (and correct) proof?

Answer: [Yes]

Justification: Due to space constraints all proofs appear in the supplemental material. We provide intuition for these proofs in the paper where space allows. Complete proofs are included in the supplemental material, along with all required Lemmas and exact assumptions.

Guidelines:

- The answer NA means that the paper does not include theoretical results.
- All the theorems, formulas, and proofs in the paper should be numbered and cross-referenced.
- All assumptions should be clearly stated or referenced in the statement of any theorems.
- The proofs can either appear in the main paper or the supplemental material, but if they appear in the supplemental material, the authors are encouraged to provide a short proof sketch to provide intuition.
- Inversely, any informal proof provided in the core of the paper should be complemented by formal proofs provided in appendix or supplemental material.
- Theorems and Lemmas that the proof relies upon should be properly referenced.

#### 4. Experimental Result Reproducibility

Question: Does the paper fully disclose all the information needed to reproduce the main experimental results of the paper to the extent that it affects the main claims and/or conclusions of the paper (regardless of whether the code and data are provided or not)?

Answer: [Yes]

Justification: We detail the experimental setup used in this work in the supplemental procedure, along with providing all code required to run and replicate these experiments also.

Guidelines:

- The answer NA means that the paper does not include experiments.
- If the paper includes experiments, a No answer to this question will not be perceived well by the reviewers: Making the paper reproducible is important, regardless of whether the code and data are provided or not.
- If the contribution is a dataset and/or model, the authors should describe the steps taken to make their results reproducible or verifiable.
- Depending on the contribution, reproducibility can be accomplished in various ways. For example, if the contribution is a novel architecture, describing the architecture fully might suffice, or if the contribution is a specific model and empirical evaluation, it may be necessary to either make it possible for others to replicate the model with the same dataset, or provide access to the model. In general, releasing code and data is often one good way to accomplish this, but reproducibility can also be provided via detailed instructions for how to replicate the results, access to a hosted model (e.g., in the case of a large language model), releasing of a model checkpoint, or other means that are appropriate to the research performed.
- While NeurIPS does not require releasing code, the conference does require all submissions to provide some reasonable avenue for reproducibility, which may depend on the nature of the contribution. For example
  - (a) If the contribution is primarily a new algorithm, the paper should make it clear how to reproduce that algorithm.
  - (b) If the contribution is primarily a new model architecture, the paper should describe the architecture clearly and fully.
  - (c) If the contribution is a new model (e.g., a large language model), then there should either be a way to access this model for reproducing the results or a way to reproduce the model (e.g., with an open-source dataset or instructions for how to construct the dataset).

1528 (d) We recognize that reproducibility may be tricky in some cases, in which case  
1529 authors are welcome to describe the particular way they provide for reproducibility.  
1530 In the case of closed-source models, it may be that access to the model is limited in  
1531 some way (e.g., to registered users), but it should be possible for other researchers  
1532 to have some path to reproducing or verifying the results.

## 1533 5. Open access to data and code

1534 Question: Does the paper provide open access to the data and code, with sufficient instruc-  
1535 tions to faithfully reproduce the main experimental results, as described in supplemental  
1536 material?

1537 Answer: [Yes]

1538 Justification: We have included an anonymized version of the code repository used to create  
1539 all experimental results in this paper.

1540 Guidelines:

- 1541 • The answer NA means that paper does not include experiments requiring code.
- 1542 • Please see the NeurIPS code and data submission guidelines ([https://nips.cc/](https://nips.cc/public/guides/CodeSubmissionPolicy)  
1543 [public/guides/CodeSubmissionPolicy](https://nips.cc/public/guides/CodeSubmissionPolicy)) for more details.
- 1544 • While we encourage the release of code and data, we understand that this might not be  
1545 possible, so “No” is an acceptable answer. Papers cannot be rejected simply for not  
1546 including code, unless this is central to the contribution (e.g., for a new open-source  
1547 benchmark).
- 1548 • The instructions should contain the exact command and environment needed to run to  
1549 reproduce the results. See the NeurIPS code and data submission guidelines ([https://](https://nips.cc/public/guides/CodeSubmissionPolicy)  
1550 [nips.cc/public/guides/CodeSubmissionPolicy](https://nips.cc/public/guides/CodeSubmissionPolicy)) for more details.
- 1551 • The authors should provide instructions on data access and preparation, including how  
1552 to access the raw data, preprocessed data, intermediate data, and generated data, etc.
- 1553 • The authors should provide scripts to reproduce all experimental results for the new  
1554 proposed method and baselines. If only a subset of experiments are reproducible, they  
1555 should state which ones are omitted from the script and why.
- 1556 • At submission time, to preserve anonymity, the authors should release anonymized  
1557 versions (if applicable).
- 1558 • Providing as much information as possible in supplemental material (appended to the  
1559 paper) is recommended, but including URLs to data and code is permitted.

## 1560 6. Experimental Setting/Details

1561 Question: Does the paper specify all the training and test details (e.g., data splits, hyper-  
1562 parameters, how they were chosen, type of optimizer, etc.) necessary to understand the  
1563 results?

1564 Answer: [Yes]

1565 Justification: We provide sufficient detail in the main text to understand the experimental  
1566 results presented. In the appendix, we completely detail all experimental details, along with  
1567 providing the exact code used as supplemental material.

1568 Guidelines:

- 1569 • The answer NA means that the paper does not include experiments.
- 1570 • The experimental setting should be presented in the core of the paper to a level of detail  
1571 that is necessary to appreciate the results and make sense of them.
- 1572 • The full details can be provided either with the code, in appendix, or as supplemental  
1573 material.

## 1574 7. Experiment Statistical Significance

1575 Question: Does the paper report error bars suitably and correctly defined or other appropriate  
1576 information about the statistical significance of the experiments?

1577 Answer: [Yes]

1578 Justification: For all experimental results we either show error bars corresponding to one  
1579 standard error or all simulation results (in the case of box plots).

Guidelines:

- The answer NA means that the paper does not include experiments.
- The authors should answer "Yes" if the results are accompanied by error bars, confidence intervals, or statistical significance tests, at least for the experiments that support the main claims of the paper.
- The factors of variability that the error bars are capturing should be clearly stated (for example, train/test split, initialization, random drawing of some parameter, or overall run with given experimental conditions).
- The method for calculating the error bars should be explained (closed form formula, call to a library function, bootstrap, etc.)
- The assumptions made should be given (e.g., Normally distributed errors).
- It should be clear whether the error bar is the standard deviation or the standard error of the mean.
- It is OK to report 1-sigma error bars, but one should state it. The authors should preferably report a 2-sigma error bar than state that they have a 96% CI, if the hypothesis of Normality of errors is not verified.
- For asymmetric distributions, the authors should be careful not to show in tables or figures symmetric error bars that would yield results that are out of range (e.g. negative error rates).
- If error bars are reported in tables or plots, The authors should explain in the text how they were calculated and reference the corresponding figures or tables in the text.

## 8. Experiments Compute Resources

Question: For each experiment, does the paper provide sufficient information on the computer resources (type of compute workers, memory, time of execution) needed to reproduce the experiments?

Answer: [Yes]

Justification: The computation required for individual experiments was relatively small (in terms of both memory and time) and is detailed in the appendix. These were run on a computing cluster.

Guidelines:

- The answer NA means that the paper does not include experiments.
- The paper should indicate the type of compute workers CPU or GPU, internal cluster, or cloud provider, including relevant memory and storage.
- The paper should provide the amount of compute required for each of the individual experimental runs as well as estimate the total compute.
- The paper should disclose whether the full research project required more compute than the experiments reported in the paper (e.g., preliminary or failed experiments that didn't make it into the paper).

## 9. Code Of Ethics

Question: Does the research conducted in the paper conform, in every respect, with the NeurIPS Code of Ethics <https://neurips.cc/public/EthicsGuidelines>?

Answer: [Yes]

Justification: We have ensured the research conforms with the code of ethics.

Guidelines:

- The answer NA means that the authors have not reviewed the NeurIPS Code of Ethics.
- If the authors answer No, they should explain the special circumstances that require a deviation from the Code of Ethics.
- The authors should make sure to preserve anonymity (e.g., if there is a special consideration due to laws or regulations in their jurisdiction).

## 10. Broader Impacts

Question: Does the paper discuss both potential positive societal impacts and negative societal impacts of the work performed?

Answer: [NA]

Justification: This paper provides theoretical guarantees for community detection in a specific class of statistical network models. Any potential societal impacts, positive or negative, will be ancillary from the theoretical focus of this paper.

Guidelines:

- The answer NA means that there is no societal impact of the work performed.
- If the authors answer NA or No, they should explain why their work has no societal impact or why the paper does not address societal impact.
- Examples of negative societal impacts include potential malicious or unintended uses (e.g., disinformation, generating fake profiles, surveillance), fairness considerations (e.g., deployment of technologies that could make decisions that unfairly impact specific groups), privacy considerations, and security considerations.
- The conference expects that many papers will be foundational research and not tied to particular applications, let alone deployments. However, if there is a direct path to any negative applications, the authors should point it out. For example, it is legitimate to point out that an improvement in the quality of generative models could be used to generate deepfakes for disinformation. On the other hand, it is not needed to point out that a generic algorithm for optimizing neural networks could enable people to train models that generate Deepfakes faster.
- The authors should consider possible harms that could arise when the technology is being used as intended and functioning correctly, harms that could arise when the technology is being used as intended but gives incorrect results, and harms following from (intentional or unintentional) misuse of the technology.
- If there are negative societal impacts, the authors could also discuss possible mitigation strategies (e.g., gated release of models, providing defenses in addition to attacks, mechanisms for monitoring misuse, mechanisms to monitor how a system learns from feedback over time, improving the efficiency and accessibility of ML).

## 11. Safeguards

Question: Does the paper describe safeguards that have been put in place for responsible release of data or models that have a high risk for misuse (e.g., pretrained language models, image generators, or scraped datasets)?

Answer: [NA]

Justification: As this work theoretical guarantees for community detection in a specific class of statistical network models, such safeguards are not applicable.

Guidelines:

- The answer NA means that the paper poses no such risks.
- Released models that have a high risk for misuse or dual-use should be released with necessary safeguards to allow for controlled use of the model, for example by requiring that users adhere to usage guidelines or restrictions to access the model or implementing safety filters.
- Datasets that have been scraped from the Internet could pose safety risks. The authors should describe how they avoided releasing unsafe images.
- We recognize that providing effective safeguards is challenging, and many papers do not require this, but we encourage authors to take this into account and make a best faith effort.

## 12. Licenses for existing assets

Question: Are the creators or original owners of assets (e.g., code, data, models), used in the paper, properly credited and are the license and terms of use explicitly mentioned and properly respected?

Answer: [Yes]

Justification: We credit the original owners of code and data used.

Guidelines:

- The answer NA means that the paper does not use existing assets.

- The authors should cite the original paper that produced the code package or dataset.
- The authors should state which version of the asset is used and, if possible, include a URL.
- The name of the license (e.g., CC-BY 4.0) should be included for each asset.
- For scraped data from a particular source (e.g., website), the copyright and terms of service of that source should be provided.
- If assets are released, the license, copyright information, and terms of use in the package should be provided. For popular datasets, [paperswithcode.com/datasets](https://paperswithcode.com/datasets) has curated licenses for some datasets. Their licensing guide can help determine the license of a dataset.
- For existing datasets that are re-packaged, both the original license and the license of the derived asset (if it has changed) should be provided.
- If this information is not available online, the authors are encouraged to reach out to the asset's creators.

### 13. New Assets

Question: Are new assets introduced in the paper well documented and is the documentation provided alongside the assets?

Answer: [\[Yes\]](#)

Justification: We provide an anonymized zip file which details the code used to generate all results.

Guidelines:

- The answer NA means that the paper does not release new assets.
- Researchers should communicate the details of the dataset/code/model as part of their submissions via structured templates. This includes details about training, license, limitations, etc.
- The paper should discuss whether and how consent was obtained from people whose asset is used.
- At submission time, remember to anonymize your assets (if applicable). You can either create an anonymized URL or include an anonymized zip file.

### 14. Crowdsourcing and Research with Human Subjects

Question: For crowdsourcing experiments and research with human subjects, does the paper include the full text of instructions given to participants and screenshots, if applicable, as well as details about compensation (if any)?

Answer: [\[NA\]](#)

Justification: Crowdsourcing or human subjects were not used in this research.

Guidelines:

- The answer NA means that the paper does not involve crowdsourcing nor research with human subjects.
- Including this information in the supplemental material is fine, but if the main contribution of the paper involves human subjects, then as much detail as possible should be included in the main paper.
- According to the NeurIPS Code of Ethics, workers involved in data collection, curation, or other labor should be paid at least the minimum wage in the country of the data collector.

### 15. Institutional Review Board (IRB) Approvals or Equivalent for Research with Human Subjects

Question: Does the paper describe potential risks incurred by study participants, whether such risks were disclosed to the subjects, and whether Institutional Review Board (IRB) approvals (or an equivalent approval/review based on the requirements of your country or institution) were obtained?

Answer: [\[NA\]](#)

Justification: Crowdsourcing or human subjects were not used in this research.



1737  
1738  
1739  
1740  
1741  
1742  
1743  
1744  
1745  
1746  
1747

Guidelines:

- The answer NA means that the paper does not involve crowdsourcing nor research with human subjects.
- Depending on the country in which research is conducted, IRB approval (or equivalent) may be required for any human subjects research. If you obtained IRB approval, you should clearly state this in the paper.
- We recognize that the procedures for this may vary significantly between institutions and locations, and we expect authors to adhere to the NeurIPS Code of Ethics and the guidelines for their institution.
- For initial submissions, do not include any information that would break anonymity (if applicable), such as the institution conducting the review.
